# Supplementary material for: Synthesis, Structural Characterization and Electrochemical Properties of Copper(II) Complexes with Functionalized Thiosemicarbazones Derived from 5-Acetylbarbituric Acid
Source: Preprints.org preprint supplement (doi:10.20944/preprints202404.1405.v1), 2024-04-22
Supplement: Supplementary file 1 [file supplementary]

## Synthesis, structural characterization and electrochemical properties of Copper(II) complexes with Functionalized Thiosemicarbazones derived from 5-Acetylbarbituric Acid

Alfonso Castiñeiras <sup>1</sup>, Nuria Fernández-Hermida <sup>1</sup>, Isabel García-Santos <sup>1,\*</sup>, Lourdes Gómez-Rodríguez <sup>1</sup>, Antonio Frontera <sup>2</sup>, and Juan Niclós-Gutiérrez <sup>3</sup>

<sup>1</sup> *Universidad de Santiago de Compostela, Departamento de Química Inorgánica, Facultad de Farmacia, Santiago de Compostela, 15782, Spain*

<sup>2</sup> *Universitat de les Illes Balears, Departament de Química, Crta de Valldemossa km 7.5, 07122 Palma de Mallorca (Balears), Spain; toni.frontera@uib.es*

<sup>3</sup> *Department of Inorganic Chemistry, Faculty of Pharmacy, University of Granada, 18071 Granada, Spain; jniclos@ugr.es*

## Supplementary material

|                                                                                 |         |
|---------------------------------------------------------------------------------|---------|
| <b>Table S1.</b> Hydrogen bond parameters                                       | pag. 2  |
| <b>Table S2.</b> Intermolecular ring-ring and ring-metal interaction parameters | pag. 2  |
| <b>Figure S1.</b> Mass spectra                                                  | pag. 3  |
| <b>Figure S2.</b> FT-IR spectra in the region 4000-500 cm <sup>-1</sup>         | pag. 6  |
| <b>Figure S3.</b> FT-IR spectra in the region 500-100 cm <sup>-1</sup>          | pag. 11 |
| <b>Figure S4.</b> UV-visible Spectra                                            | pag. 16 |
| <b>Figure S5.</b> EPR spectra                                                   | pag. 20 |
| <b>Figure S6.</b> View of the unit cell for <b>3a</b>                           | pág. 24 |
| <b>Figure S7.</b> View of the unit cell for <b>4</b>                            | pag. 25 |
| <b>Figure S8.</b> View of the unit cell for <b>6</b>                            | pag. 26 |
| <b>Figure S9.</b> Cyclic voltammograms                                          | pag. 27 |

**Table S1.** Hydrogen bond parameters [ $\text{\AA}$ ,  $^\circ$ ] for  $[\text{Cu}(\text{HAc}b\text{DM})(\text{H}_2\text{O})_2](\text{NO}_3)\cdot\text{H}_2\text{O}$  (**3a**),  $[\text{Cu}(\text{HAc}b\text{DM})(\text{H}_2\text{O})_2]\text{ClO}_4$  (**4**),  $[\text{Cu}(\text{HAc}b\text{Hexim})\text{Cl}]$  (**6**). The letters in brackets refer to the symmetry codes shown in the text and figures.

| Compound                              | D–H...A                               | D–H     | H...A    | D...A     | $\angle\text{DHA}$ | Symmetry code       |
|---------------------------------------|---------------------------------------|---------|----------|-----------|--------------------|---------------------|
| <b>3a</b>                             | O(12)-<br>H(12A)...O(31) <sup>a</sup> | 0.94    | 1.83     | 2.753(6)  | 169.5              | -x+1,-y+1,-z+1      |
|                                       | O(12)-<br>H(12B)...O(14) <sup>b</sup> | 0.92    | 1.86     | 2.743(5)  | 160.3              | -x+2,-y+1,-z+1      |
|                                       | O(14)-H(14A)...O(1)                   | 0.95    | 2.24     | 2.902(6)  | 126.1              |                     |
|                                       | O(14)-<br>H(14B)...O(23) <sup>d</sup> | 0.87    | 1.91     | 2.775(5)  | 169.8              | -x+1,-y,-z+1        |
|                                       | N(11)-H(11)...O(23) <sup>e</sup>      | 0.93    | 1.88     | 2.789(5)  | 167.0              | x+1,y+1,z           |
|                                       | N(13)-H(13)...O(42)                   | 0.90    | 2.29     | 3.084(7)  | 147.4              |                     |
|                                       | N(15)-H(15)...O(15) <sup>f</sup>      | 0.89    | 1.95     | 2.829(5)  | 170.9              | -x+2,-y+1,-z        |
|                                       | O(22)-<br>H(22B)...O(41) <sup>g</sup> | 0.95    | 1.70     | 2.646(5)  | 176.8              | -x+1,-y,-z          |
|                                       | O(24)-H(24A)...O(2)                   | 0.93    | 2.09     | 2.765(6)  | 128.0              |                     |
|                                       | O(24)-<br>H(24B)...O(22) <sup>h</sup> | 0.91    | 1.86     | 2.699(5)  | 152.2              | -x,-y,-z            |
|                                       | N(21)-H(21)...O(13) <sup>i</sup>      | 0.94    | 1.88     | 2.784(5)  | 159.2              | x-1,y-1,z           |
|                                       | N(23)-H(23)...O(32)                   | 1.06    | 2.16     | 3.165(8)  | 157.0              |                     |
|                                       | N(25)-H(25)...O(1) <sup>d</sup>       | 0.97    | 1.90     | 2.865(5)  | 171.4              | -x+1,-y,-z+1        |
|                                       | O(1)-H(1A)...O(43)                    | 1.05    | 1.91     | 2.879(7)  | 152.1              |                     |
|                                       | O(1)-H(1B)...O(25) <sup>c</sup>       | 1.04    | 1.77     | 2.802(6)  | 169.5              | x+1,y,z             |
| O(2)-H(2B)...O(32)                    | 0.90                                  | 2.54    | 3.411(9) | 163.9     |                    |                     |
|                                       |                                       |         |          |           |                    |                     |
| <b>4</b>                              | O(1)-H(1A)...O(2) <sup>a</sup>        | 0.96    | 1.83     | 2.680(12) | 146.1              | -x+1,-y,-z+1        |
|                                       | O(1)-H(1B)...O(16) <sup>b</sup>       | 0.96    | 2.09     | 2.716(12) | 121.7              | -x+1/2,y-1/2,-z+1/2 |
|                                       | O(2)-H(2A)...O(13) <sup>c</sup>       | 0.96    | 2.01     | 2.856(11) | 146.6              | x,y,z-1             |
|                                       | O(2)-H(2B)...O(18A)                   | 0.96    | 2.61     | 3.24(2)   | 123.5              |                     |
|                                       | O(2)-H(2B)...O(18B)                   | 0.96    | 2.21     | 3.11(3)   | 156.2              |                     |
|                                       | N(11)-H(11)...O(13) <sup>d</sup>      | 0.86    | 2.06     | 2.915(13) | 175.7              | -x+1,-y,-z+2        |
|                                       | N(15)-<br>H(15)...O(18A) <sup>e</sup> | 0.86    | 2.29     | 3.14(2)   | 172.8              | x,y,z+1             |
| N(15)-<br>H(15)...O(19B) <sup>e</sup> | 0.86                                  | 2.28    | 3.06(3)  | 150.4     | x,y,z+1            |                     |
|                                       |                                       |         |          |           |                    |                     |
| <b>6</b>                              | N(11)-<br>H(11A)...O(15) <sup>a</sup> | 0.84(3) | 2.04(3)  | 2.851(3)  | 162(3)             | -x+1,y-1/2,-z+1/2   |
|                                       | N(13)-<br>H(13A)...O(13) <sup>b</sup> | 0.86(3) | 2.19(3)  | 2.939(3)  | 145(3)             | x-1/2,y,-z+1/2      |
|                                       | N(15)-<br>H(15A)...Cl(1) <sup>c</sup> | 0.80(3) | 2.72(3)  | 3.437(2)  | 151(3)             | -x+1,y+1/2,-z+1/2   |

**Table S2.** Intermolecular ring-ring and ring-metal interaction parameters ( $\text{\AA}$ ,  $^\circ$ ) for  $[\text{Cu}(\text{HAc}b\text{DM})(\text{H}_2\text{O})_2]\text{ClO}_4$  (**4**)\*.

| Ring                    | $\pi \cdots \pi$     | Cg-<br>Cg | $\alpha$ | IPD    | Symmetry  |
|-------------------------|----------------------|-----------|----------|--------|-----------|
| Cu1/S1/C18/N13/N12      | Cg1-Cg1 <sup>a</sup> | 3.7151    | 0        | 3.6077 | -x,-y,1-z |
| Cu1/S1/C18/N13/N12      | Cg1-Cg2 <sup>a</sup> | 3.8532    | 5        | 3.6203 | -x,-y,1-z |
| Cu1/O11/C11/C16/C17/N12 |                      |           |          |        |           |
| Cu1/O11/C11/C16/C17/N12 | Cg2-Cg1 <sup>a</sup> | 3.8532    | 5        | 3.4833 | -x,-y,1-z |
| Cu1/S1/C18/N13/N12      |                      |           |          |        |           |
| Cu1/S1/C18/N13/N12      | Cg1-Cu1 <sup>a</sup> | 3.911     | 22.51    |        | -x,-y,1-z |

\*CgI/CgJ are the centroids of the corresponding rings. Cg-Cg is the center-to-center distance (distance between ring centroids),  $\alpha$  is the angle between mean planes of the rings, IPD is the mean interplanar distance (distance from one plane to the neighboring centroid). For details, see Janiak, C. (2000). J. Chem. Soc. Dalton Trans. pp. 3885–3898.

Figure S1. Mass spectra of the complexes (FAB).

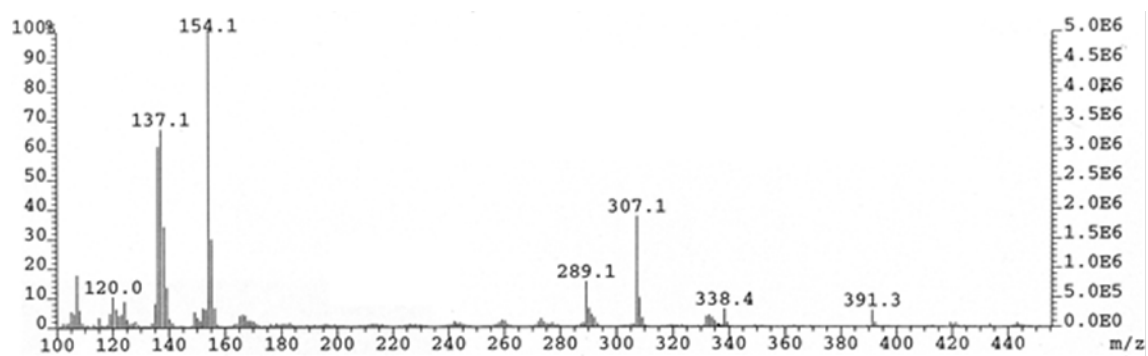

$[Cu(HAcDM)(OAc)] \cdot 3H_2O$  (1·3H<sub>2</sub>O)

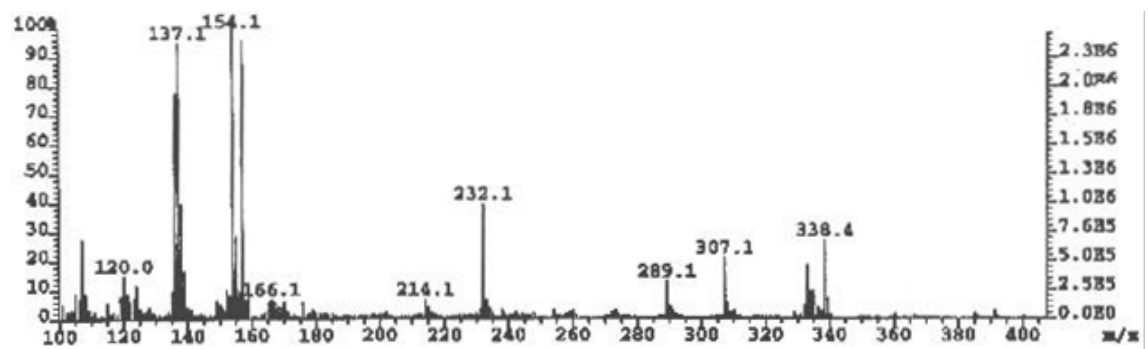

$[Cu(HAcDM)Cl] \cdot 1/2EtOH$  (2·1/2EtOH)

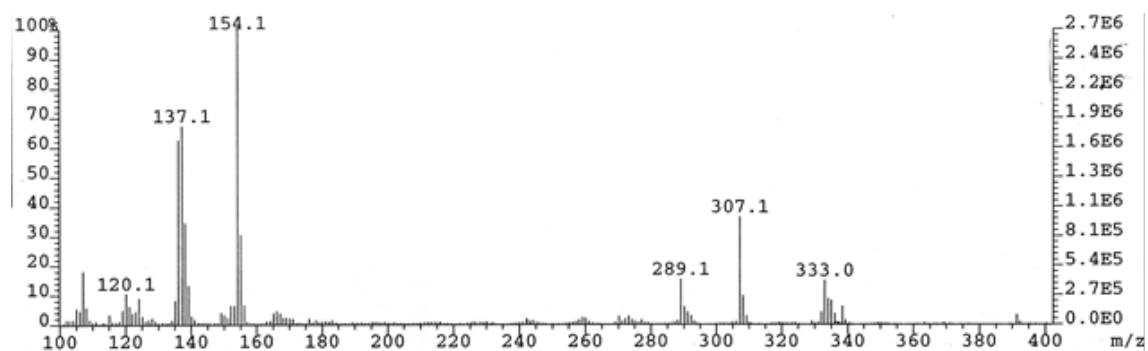

$[Cu(HAcDM)(NO_3)]$  (3)

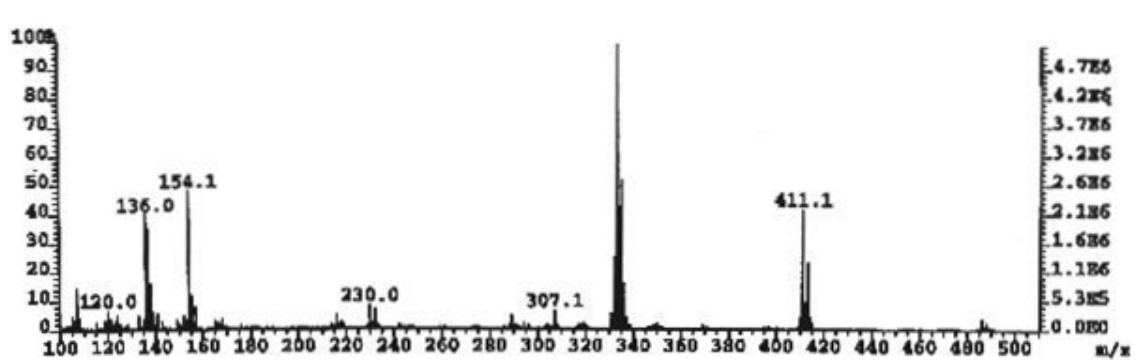

[Cu(HAcDM)(H<sub>2</sub>O)<sub>2</sub>]ClO<sub>4</sub> (4)

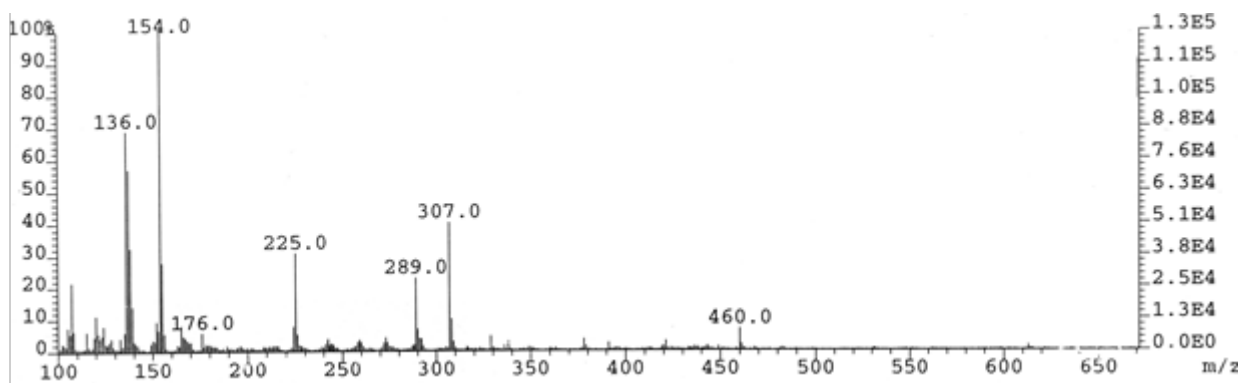

[Cu(HAcHexim)(OAc)]·5H<sub>2</sub>O (5·5H<sub>2</sub>O)

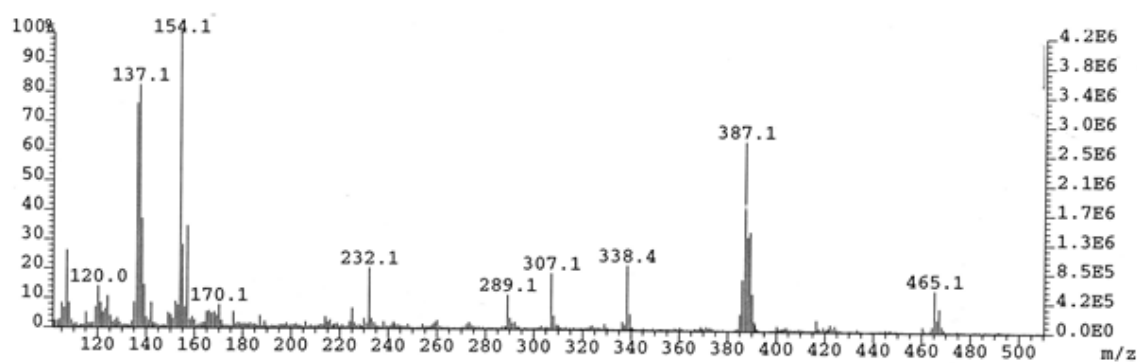

[Cu(HAcHexim)Cl]·1/2EtOH (6·1/2EtOH)

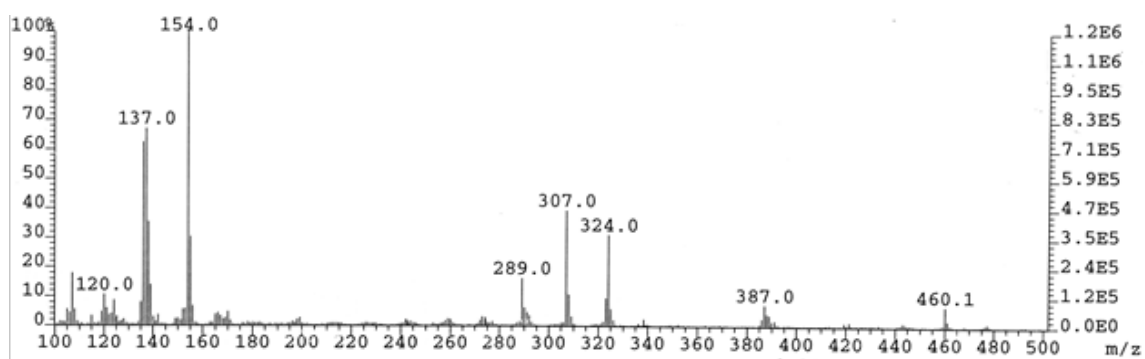

$[Cu(HAcHexim)(NO_3)] \cdot 1/2H_2O$  (7·1/2H<sub>2</sub>O)

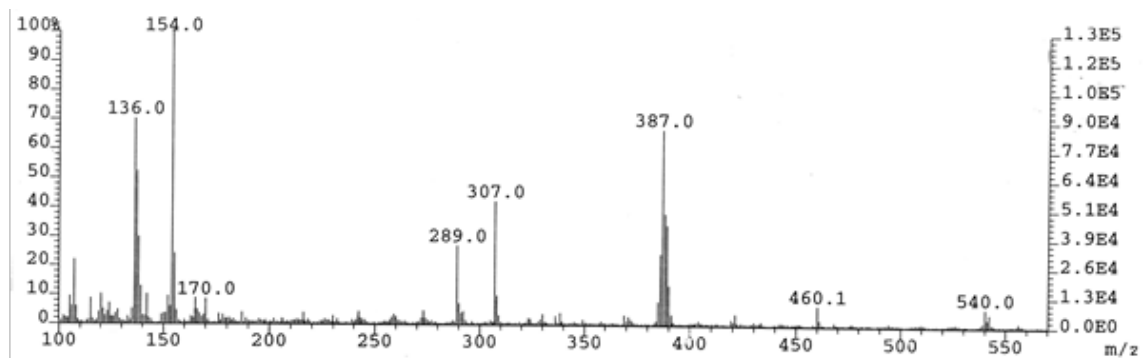

$[Cu(HAcHexim)ClO_4]$  (8)

Figure S2. FT-IR spectra in the region 4000-500  $\text{cm}^{-1}$

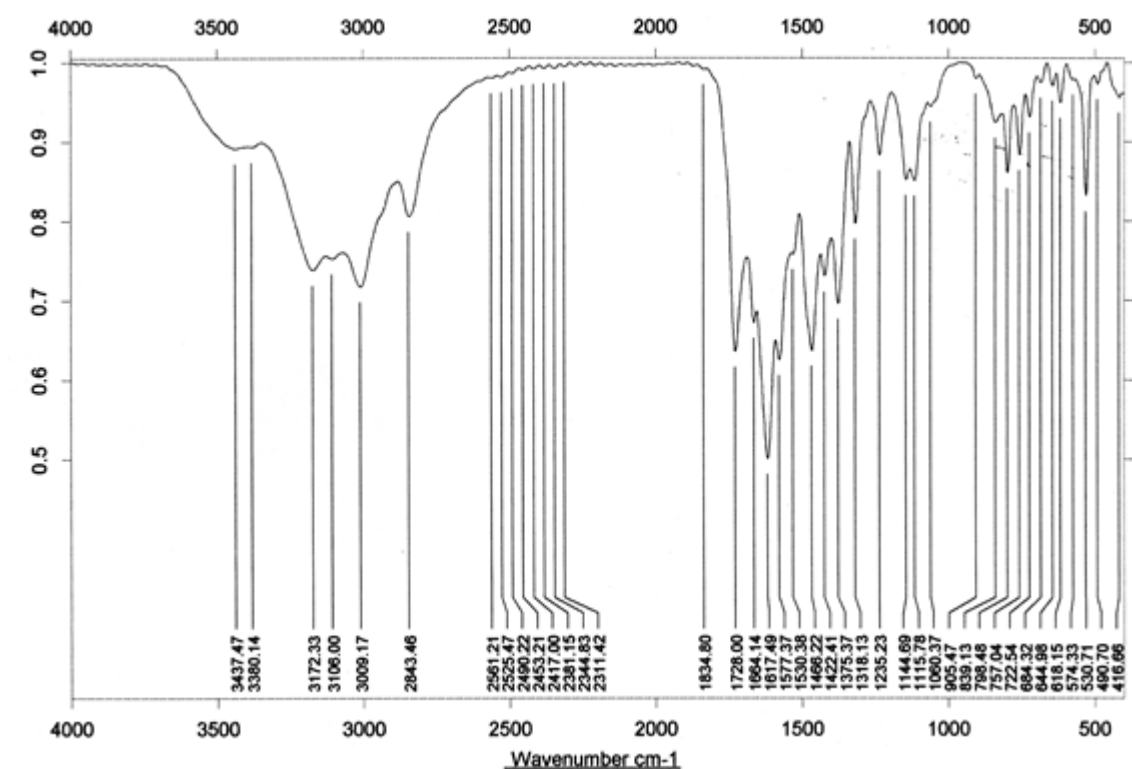

$\text{H}_2\text{AcbDM}\cdot\text{H}_2\text{O}$

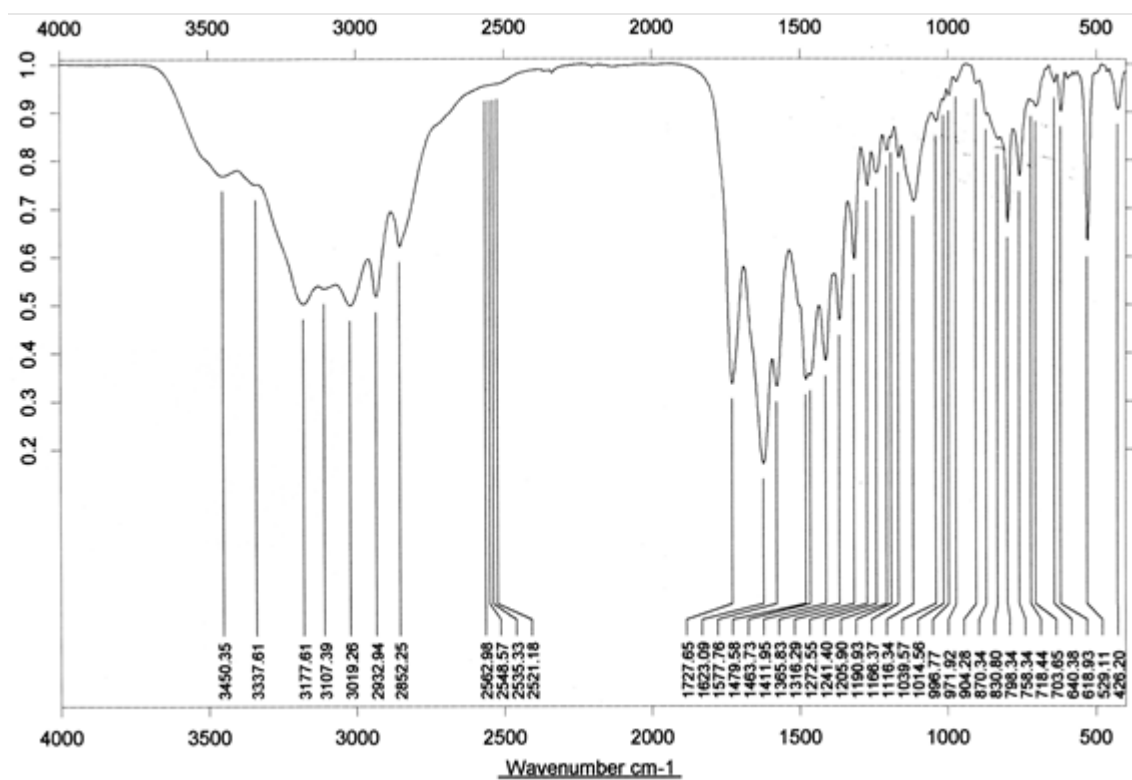

$\text{H}_2\text{AcbHexim}\cdot\text{H}_2\text{O}$

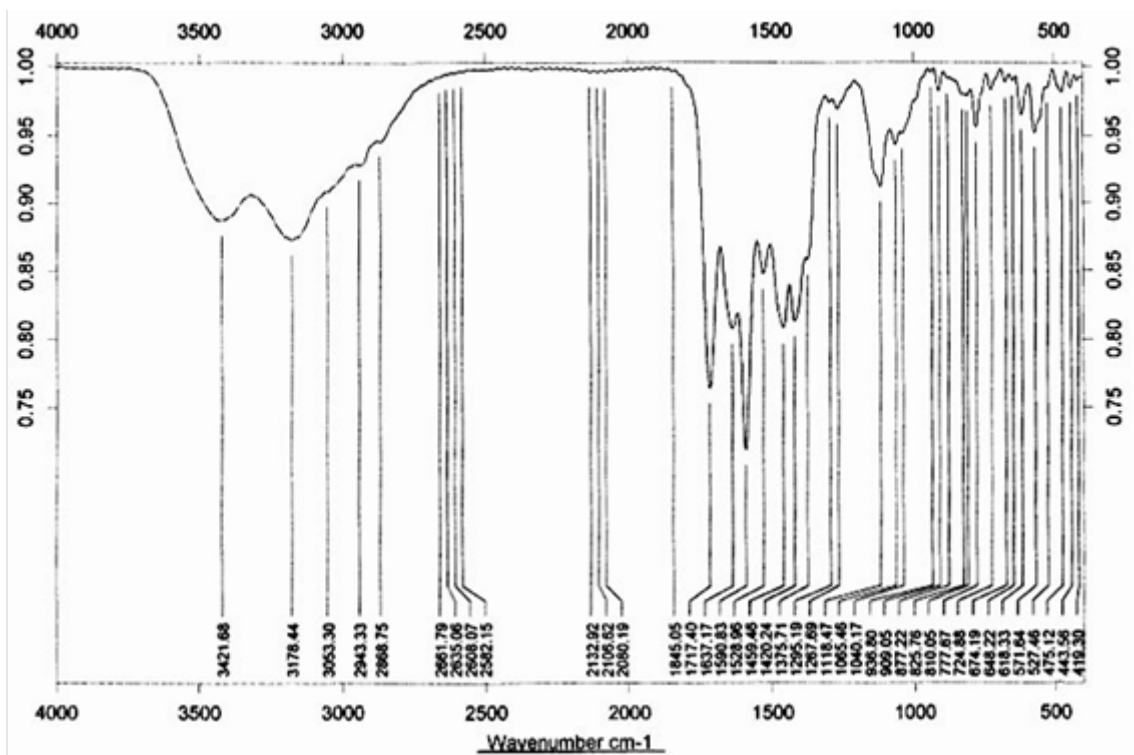

$[Cu(HAcbDM)(OAc)] \cdot 3H_2O$

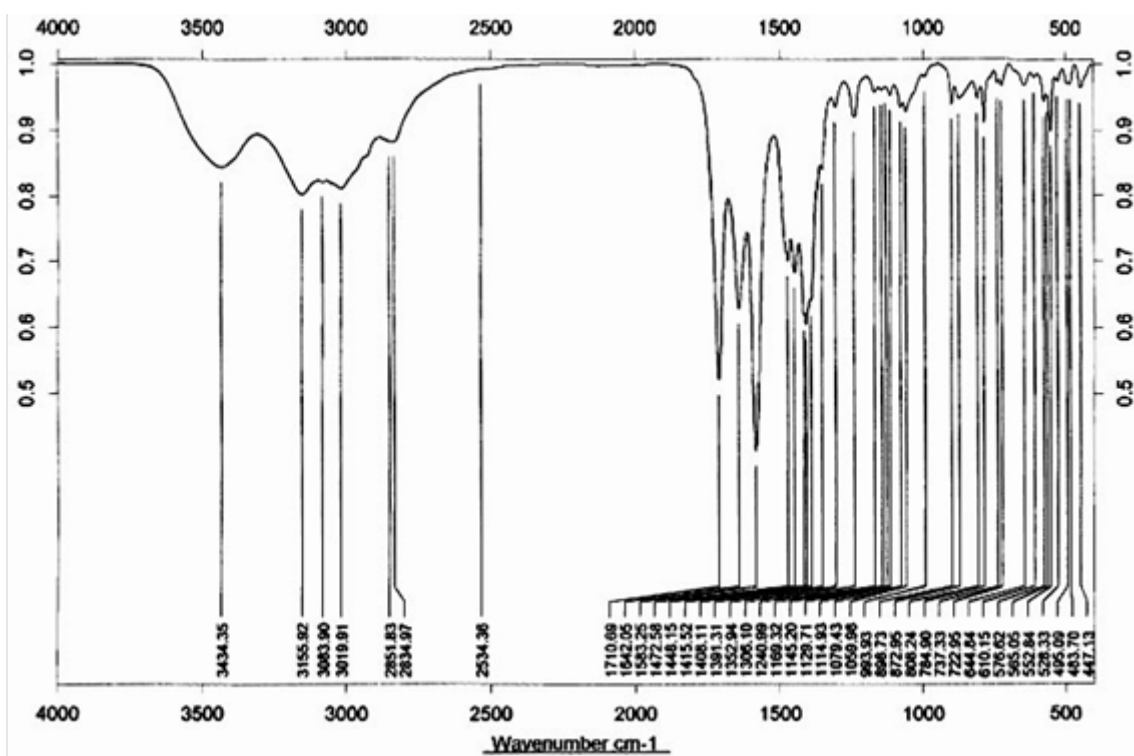

$[Cu(HAcbDM)Cl] \cdot 1/2EtOH$

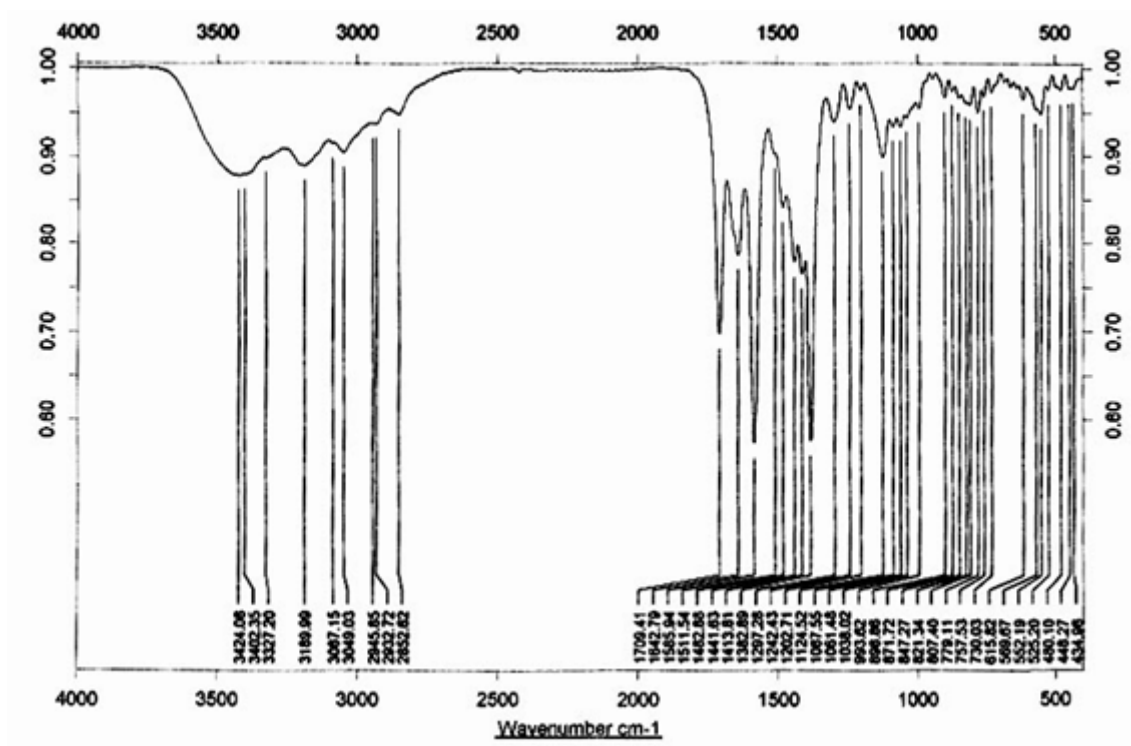

[Cu(HAcbDM)(NO<sub>3</sub>)]

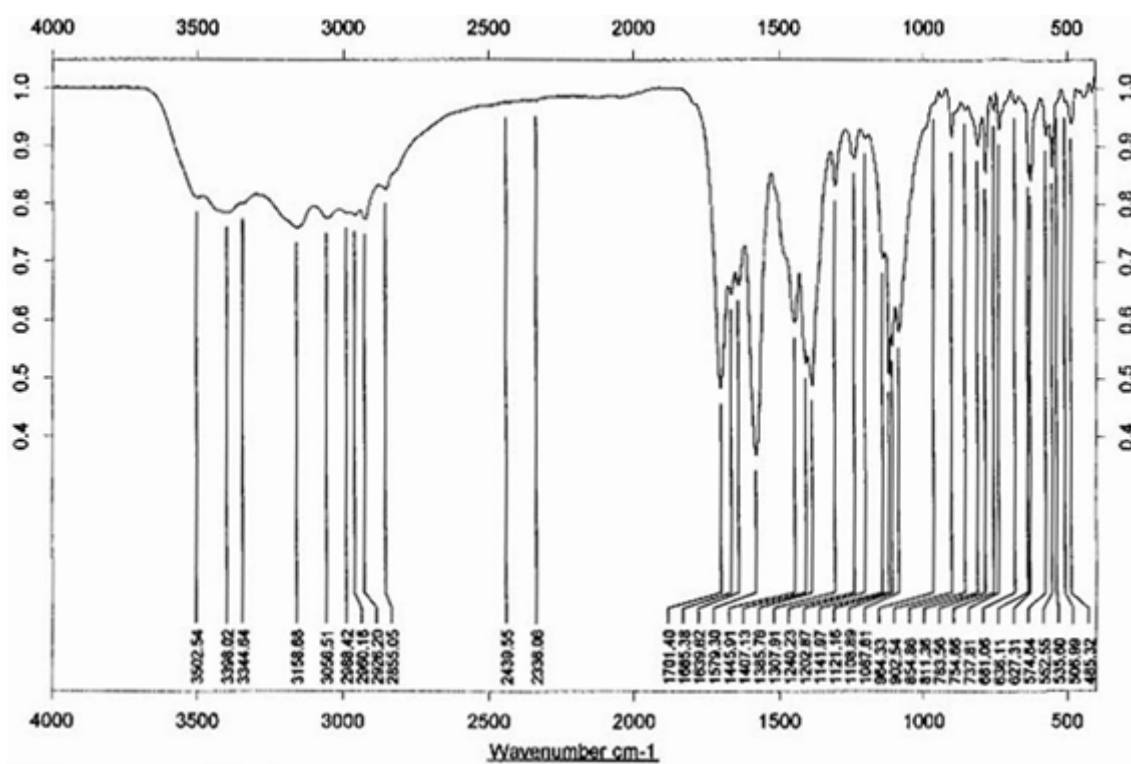

[Cu(HAcbDM)(H<sub>2</sub>O)<sub>2</sub>]ClO<sub>4</sub>

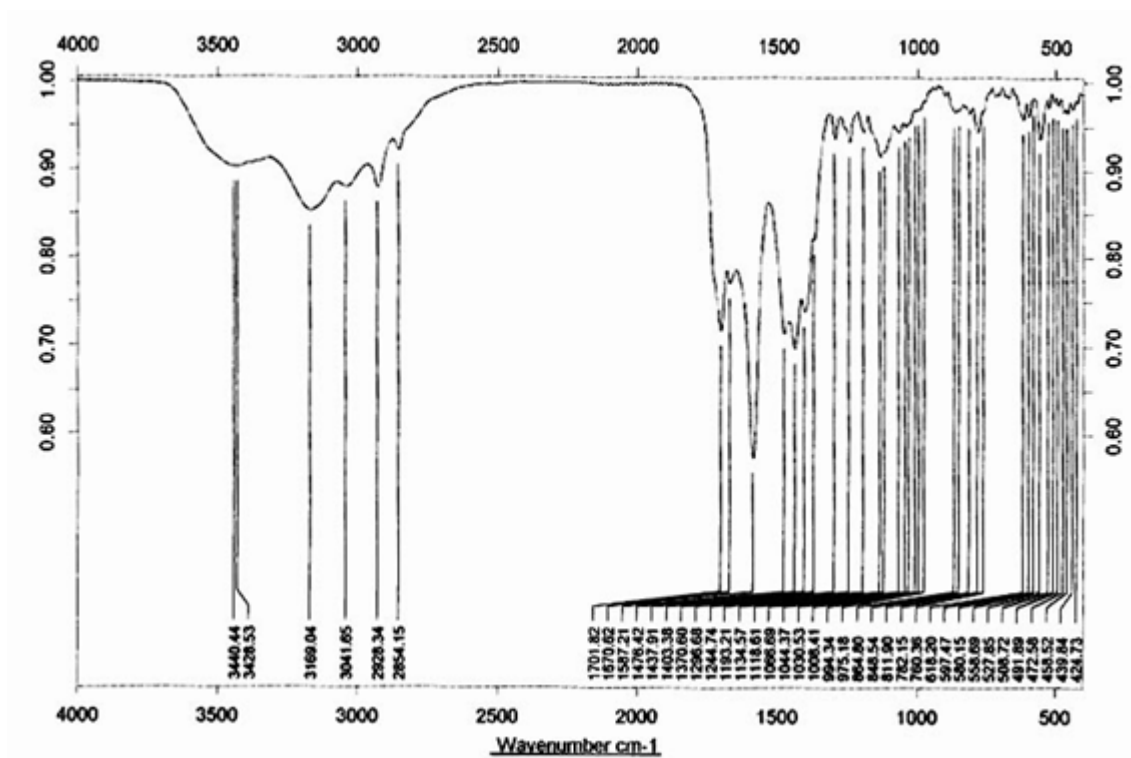

$[Cu(HAcHexim)(OAc)] \cdot 5H_2O$

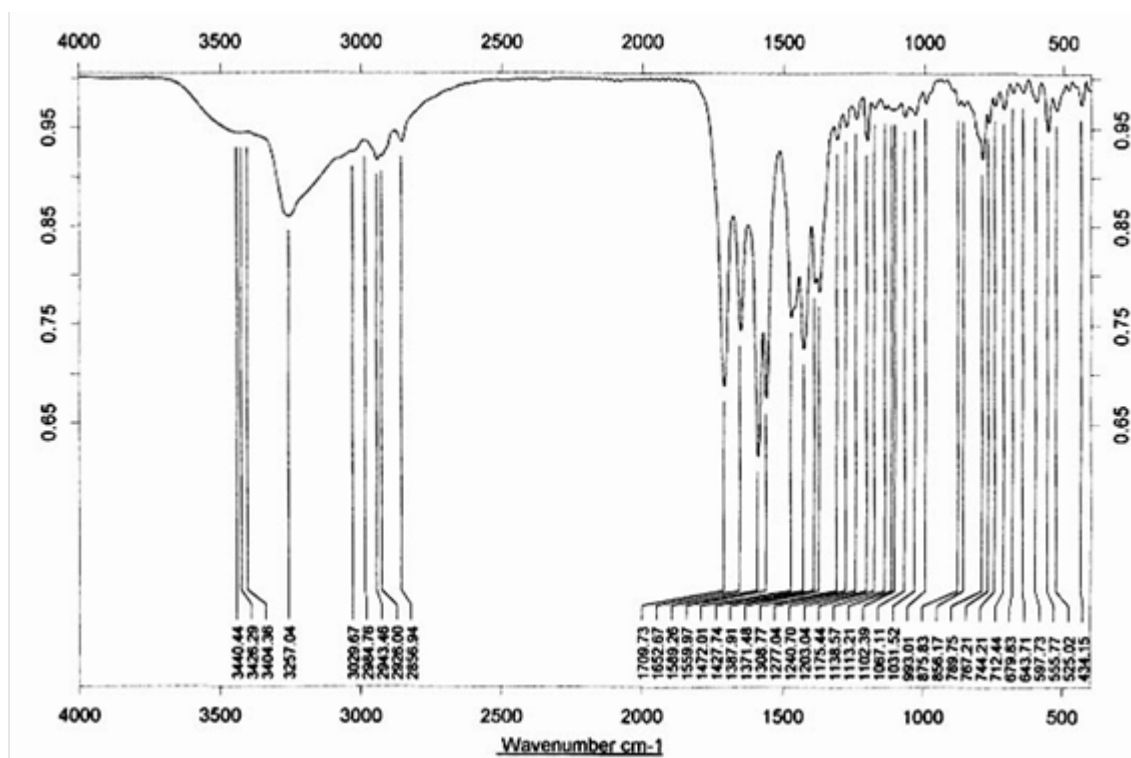

$[Cu(HAcHexim)Cl] \cdot 1/2EtOH$

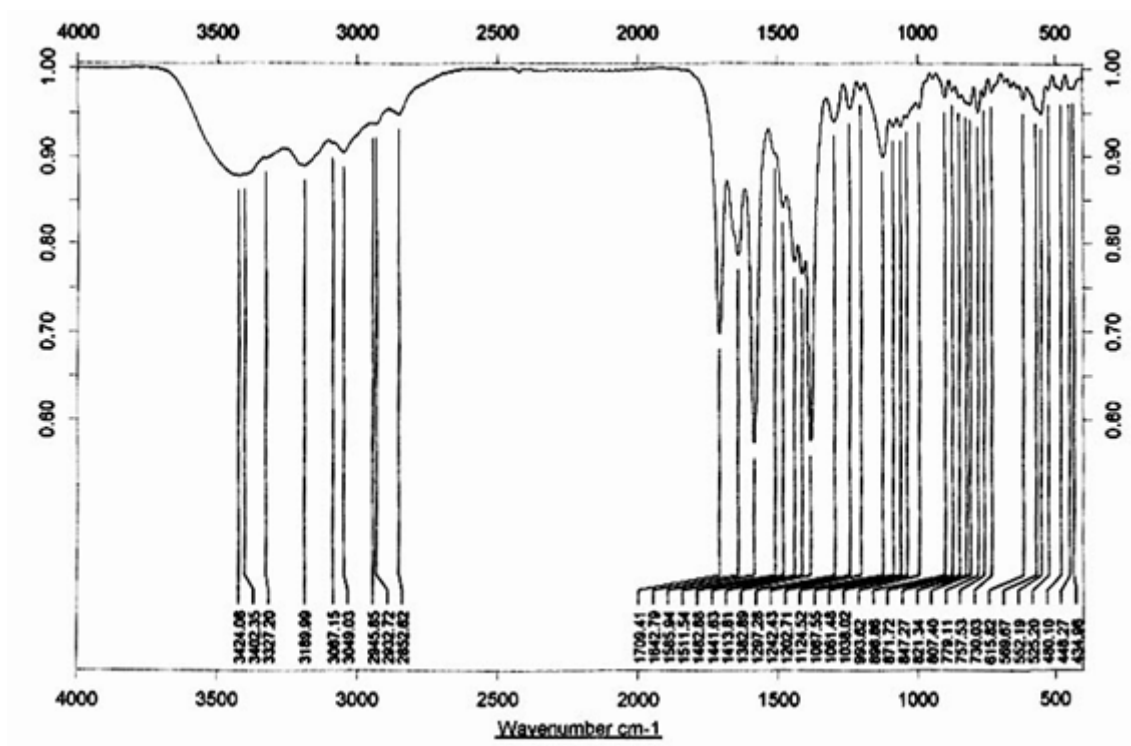

$[Cu(HAcHexim)(NO_3)] \cdot 1/2H_2O$

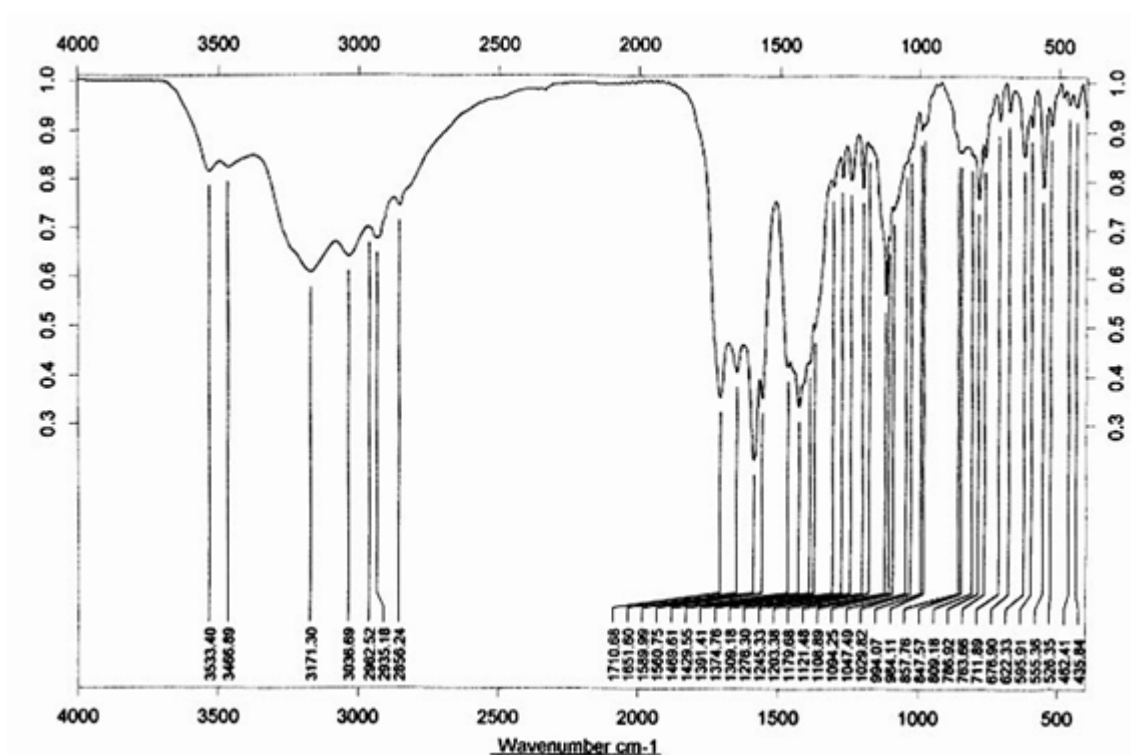

$[Cu(HAcHexim)ClO_4]$

Figure S3. FT-IR spectra in the region 500-100  $\text{cm}^{-1}$

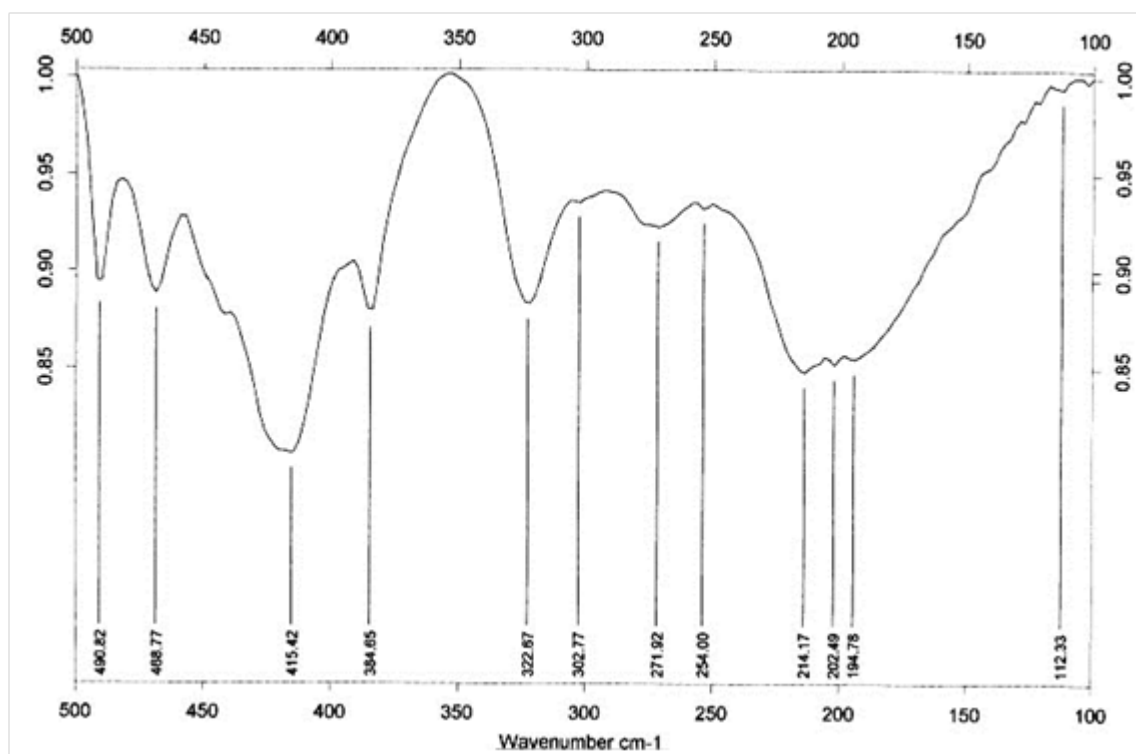

$\text{H}_2\text{AcbDM}\cdot\text{H}_2\text{O}$

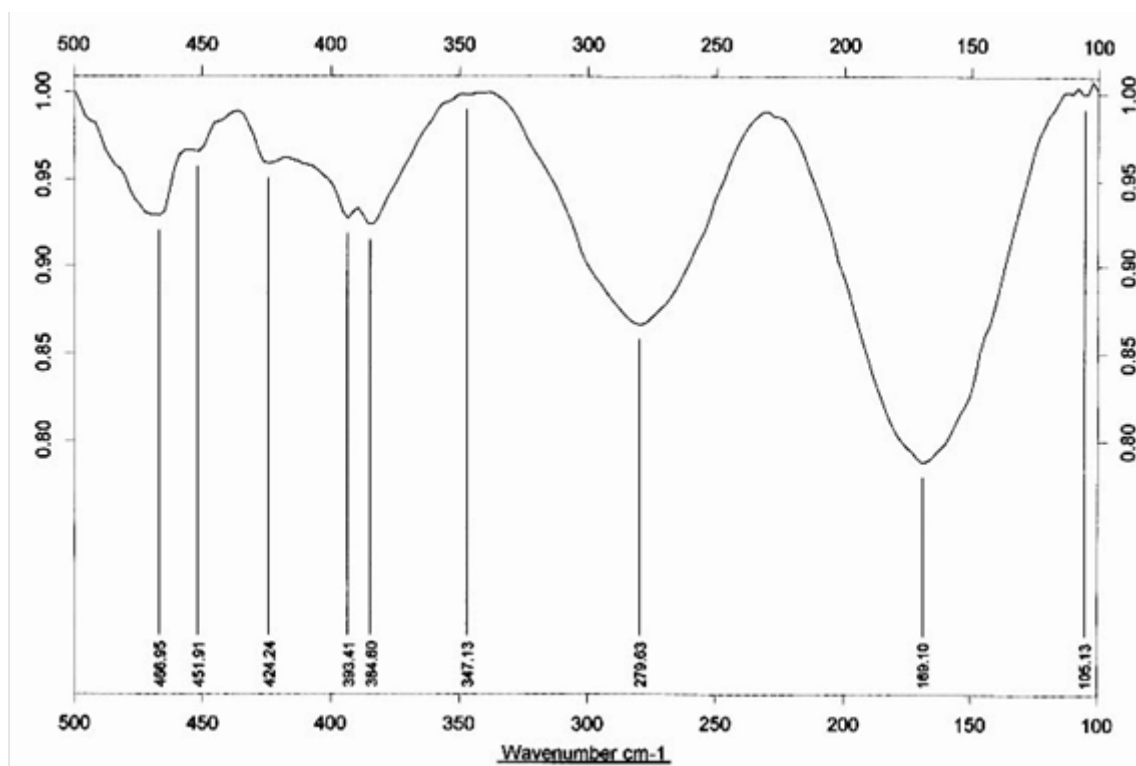

$\text{H}_2\text{AcbHexim}\cdot\text{H}_2\text{O}$

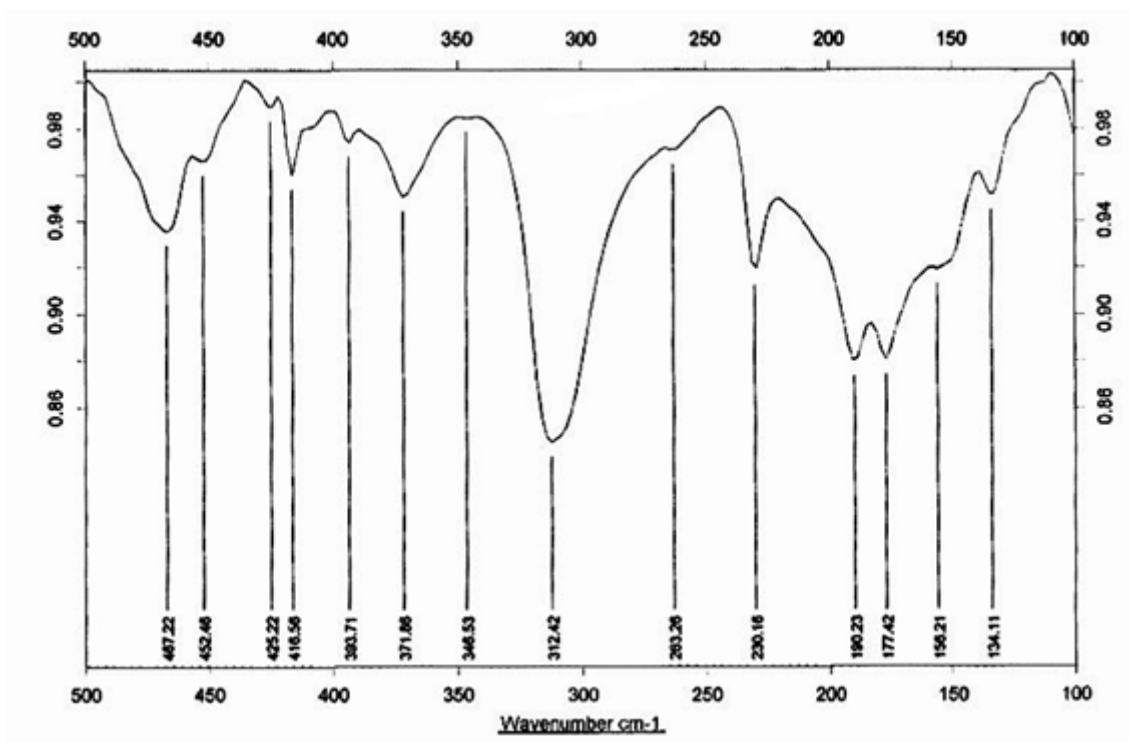

$[Cu(HAcDM)(OAc)] \cdot 3H_2O$

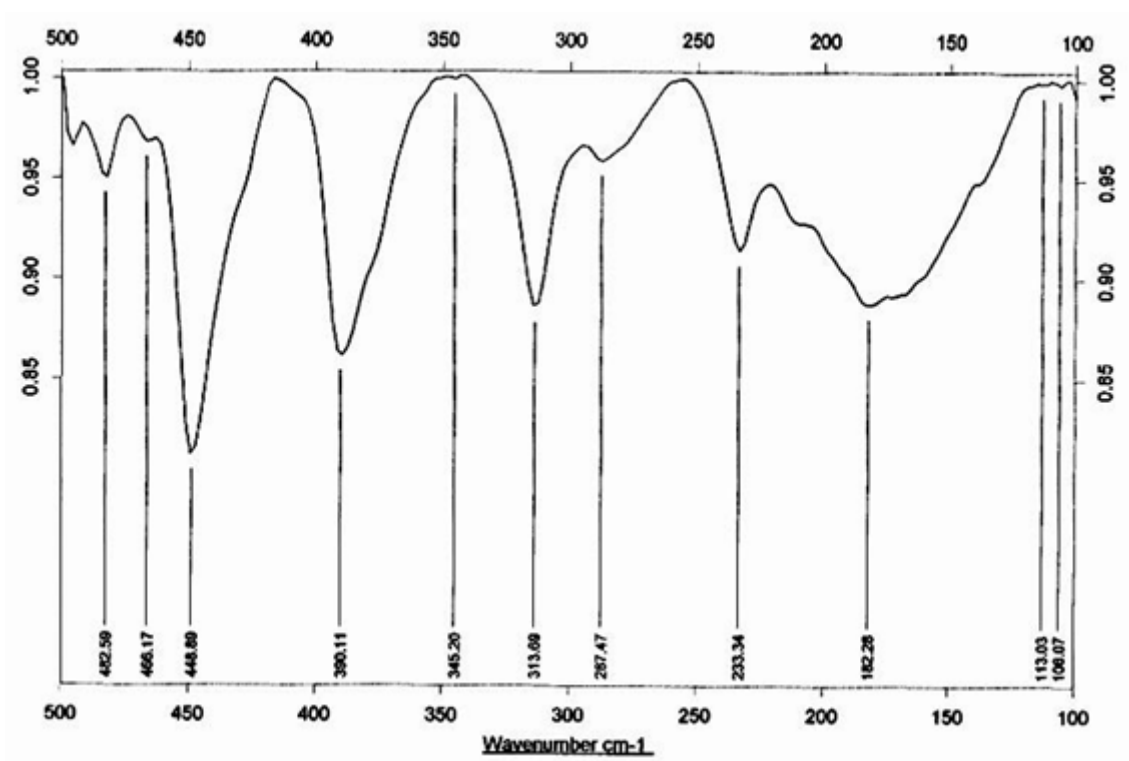

$[Cu(HAcDM)Cl] \cdot 1/2EtOH$

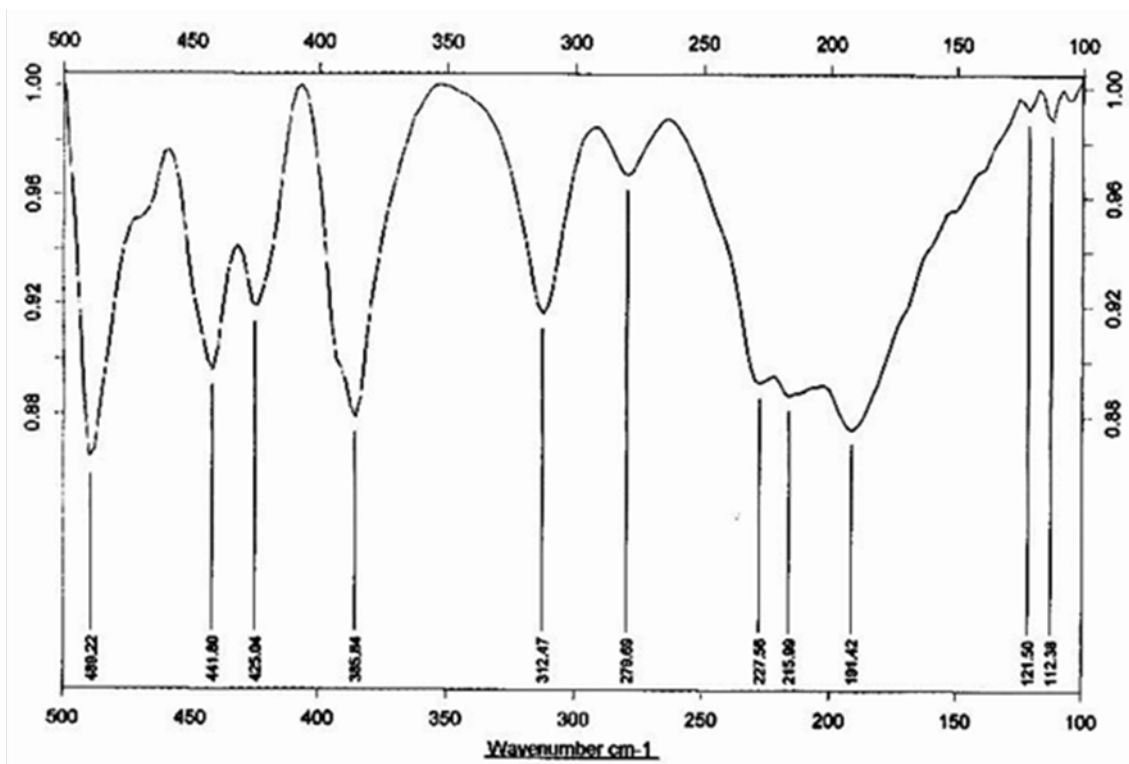

$[Cu(HAcbDM)(NO_3)]$

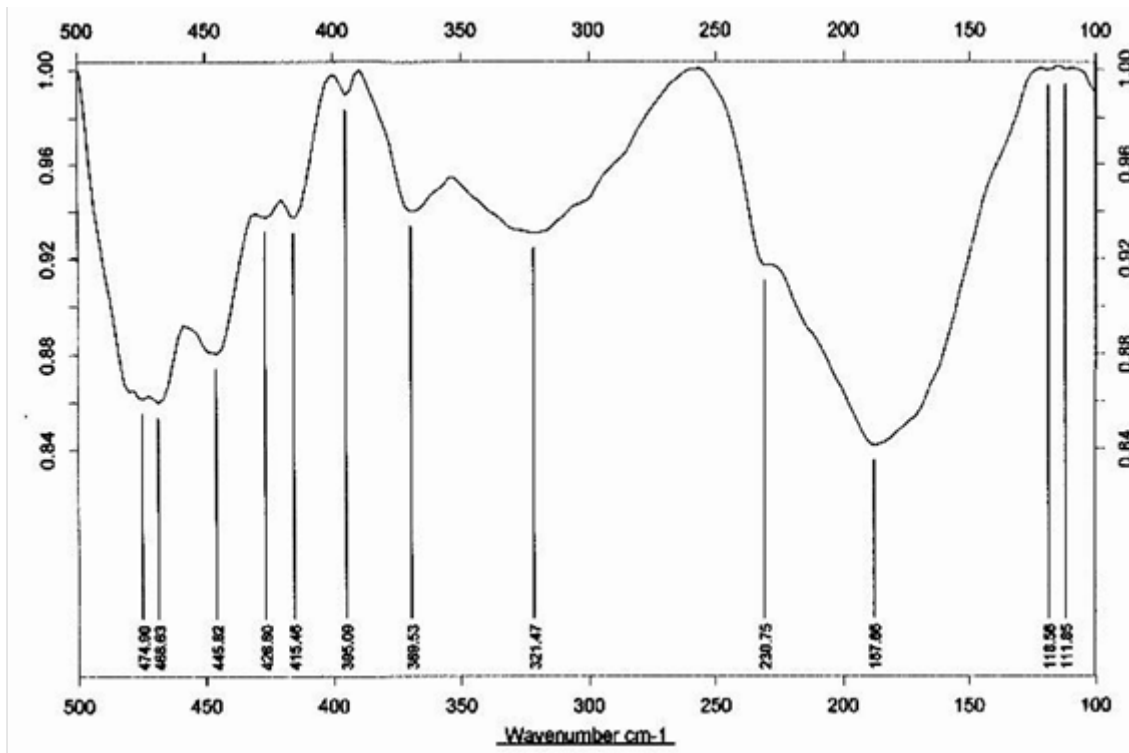

$[Cu(HAcbDM)(H_2O)_2]ClO_4$

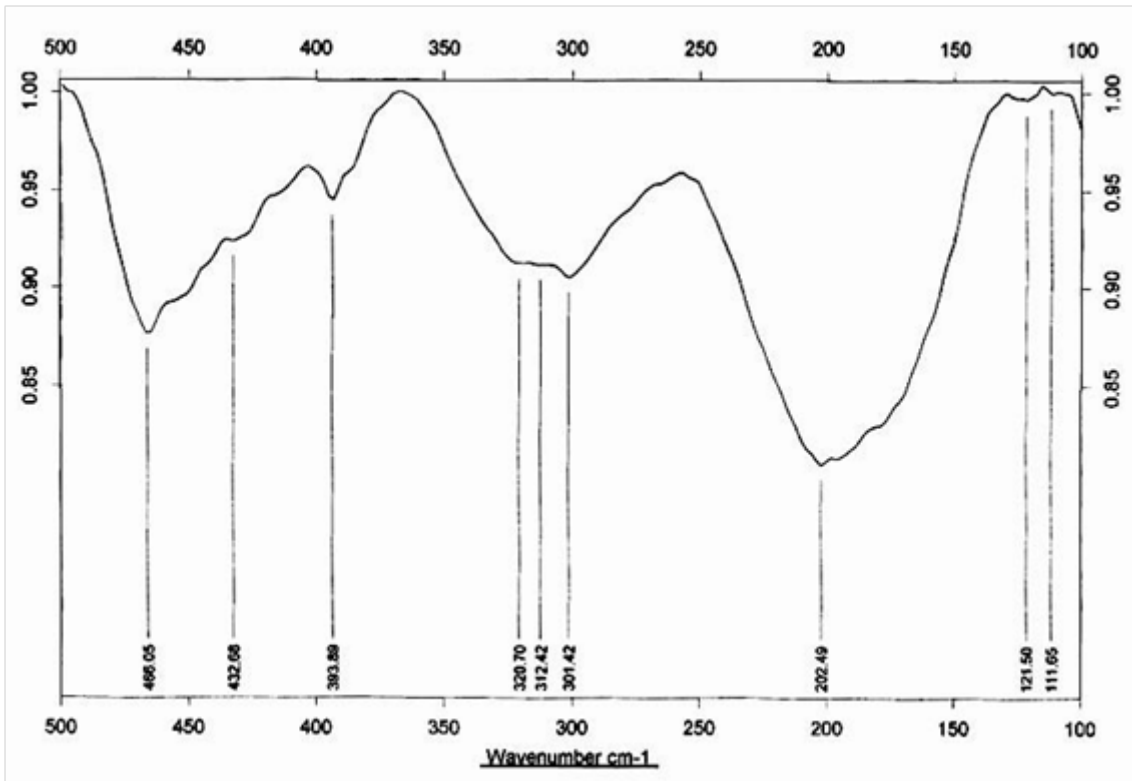

$[Cu(HAcHexim)(OAc)] \cdot 5H_2O$

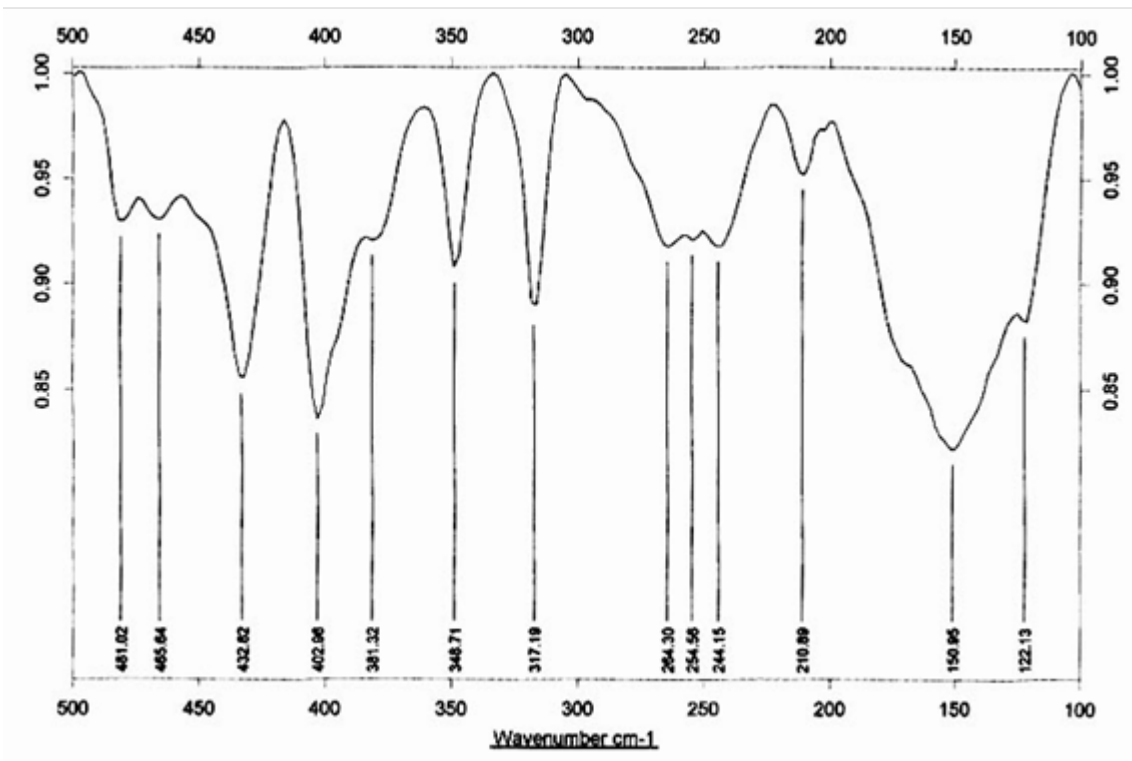

$[Cu(HAcHexim)Cl] \cdot 1/2EtOH$

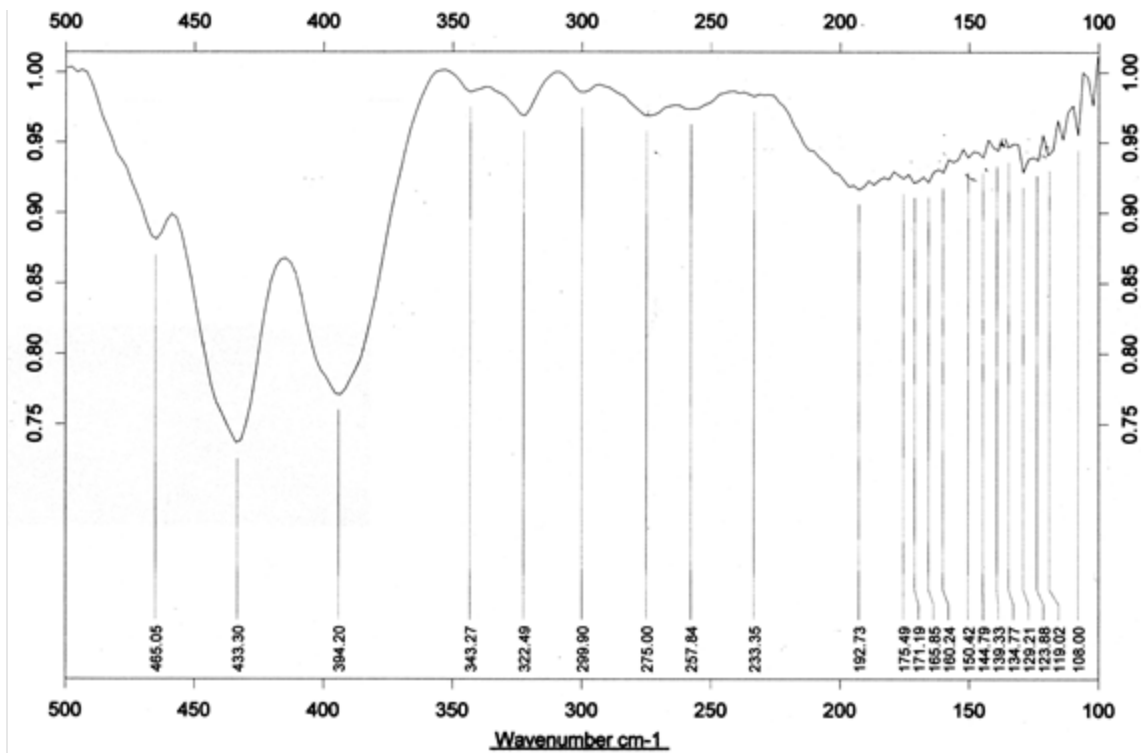

$[Cu(HAcHexim)(NO_3)] \cdot 1/2H_2O$

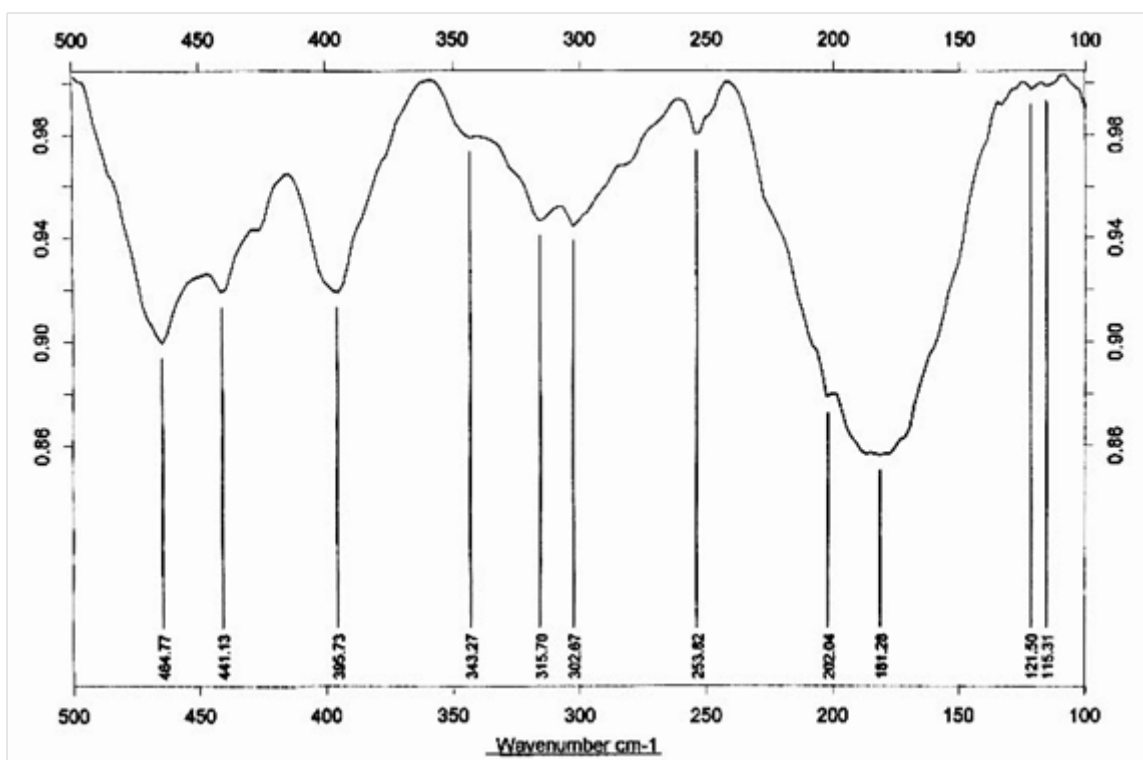

$[Cu(HAcHexim)ClO_4]$

Figure S4. UV-visible Spectra

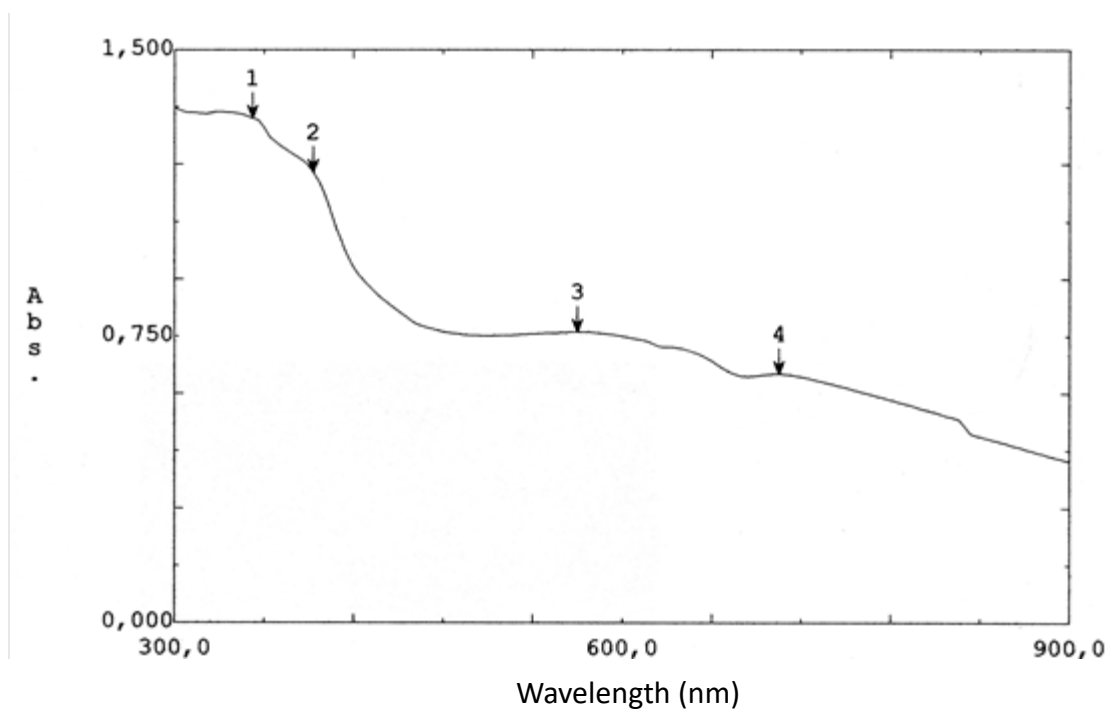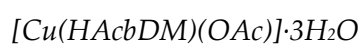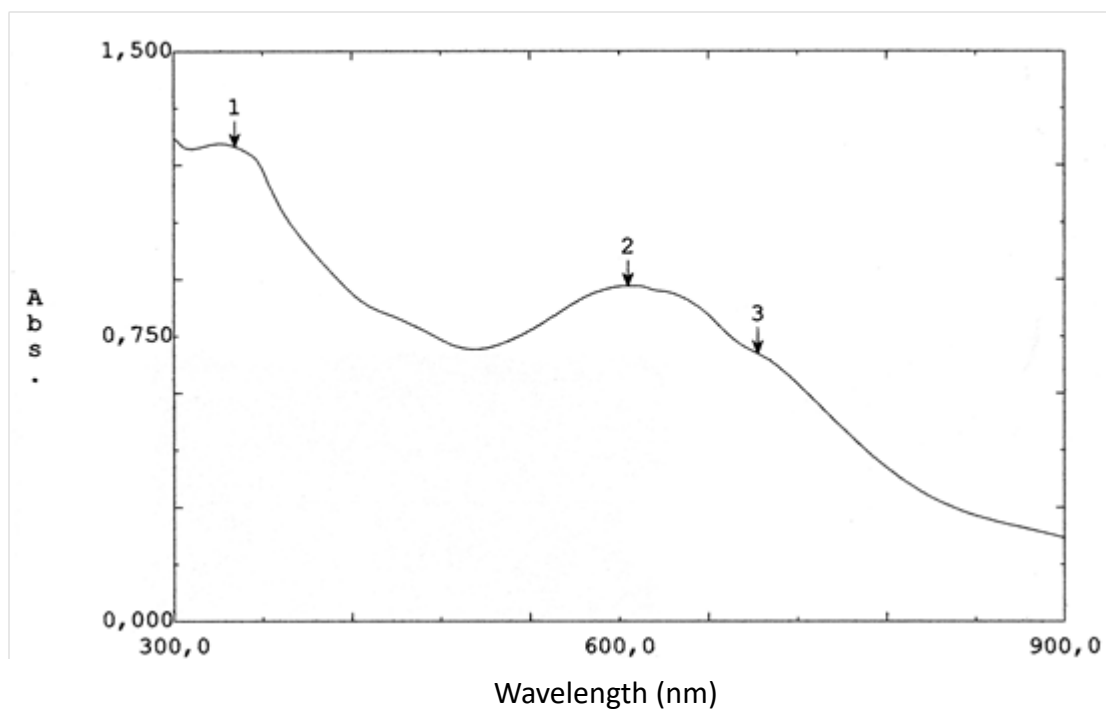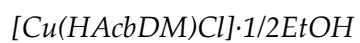

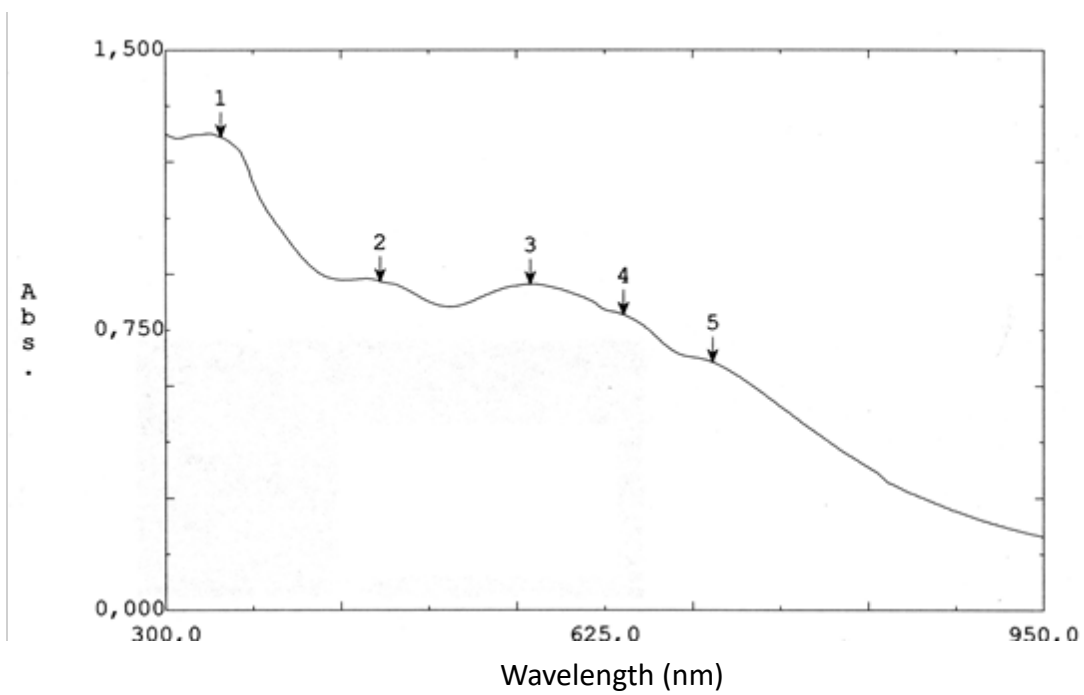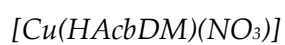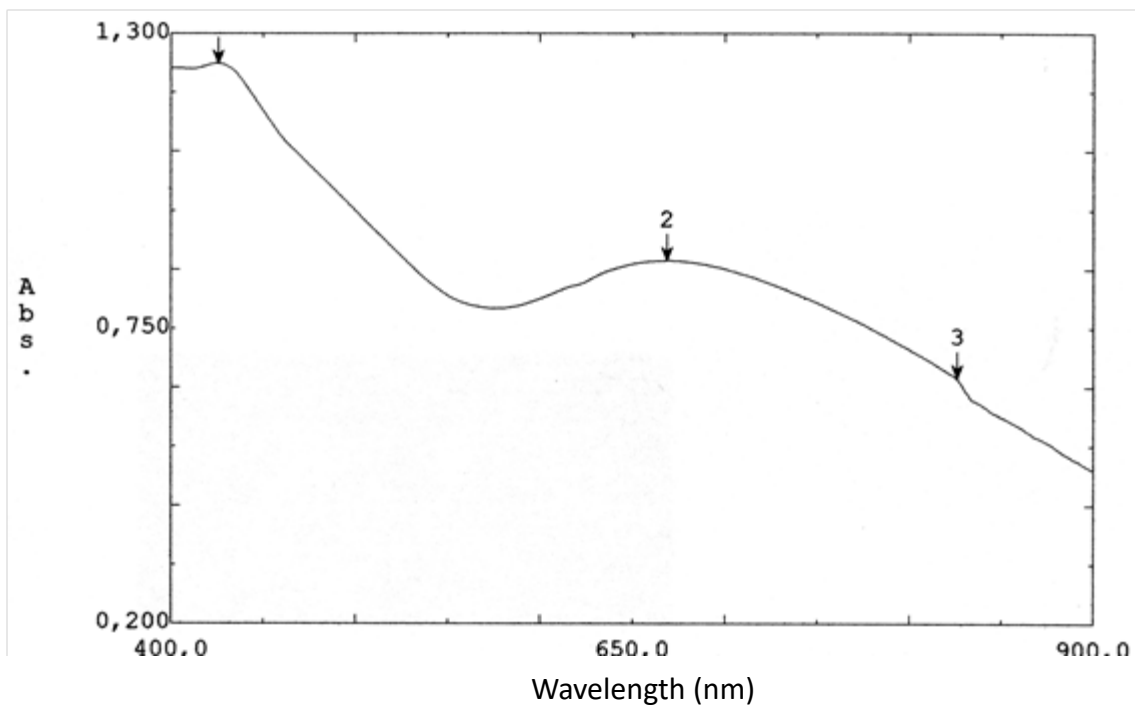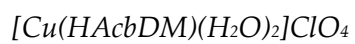



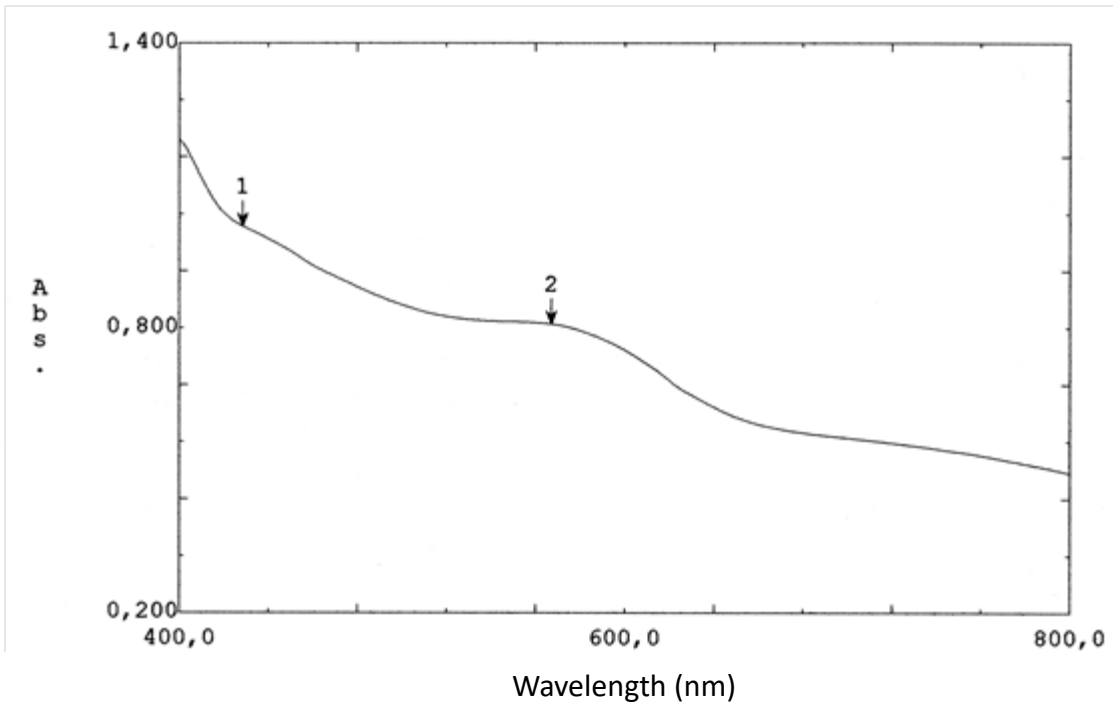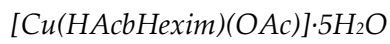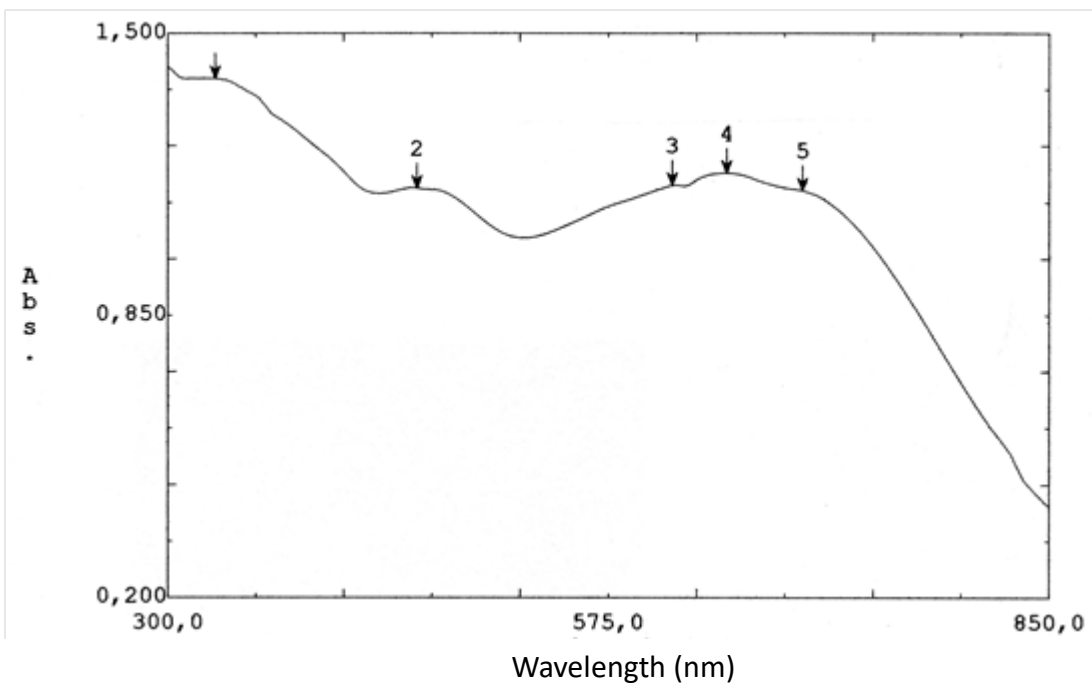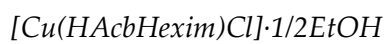

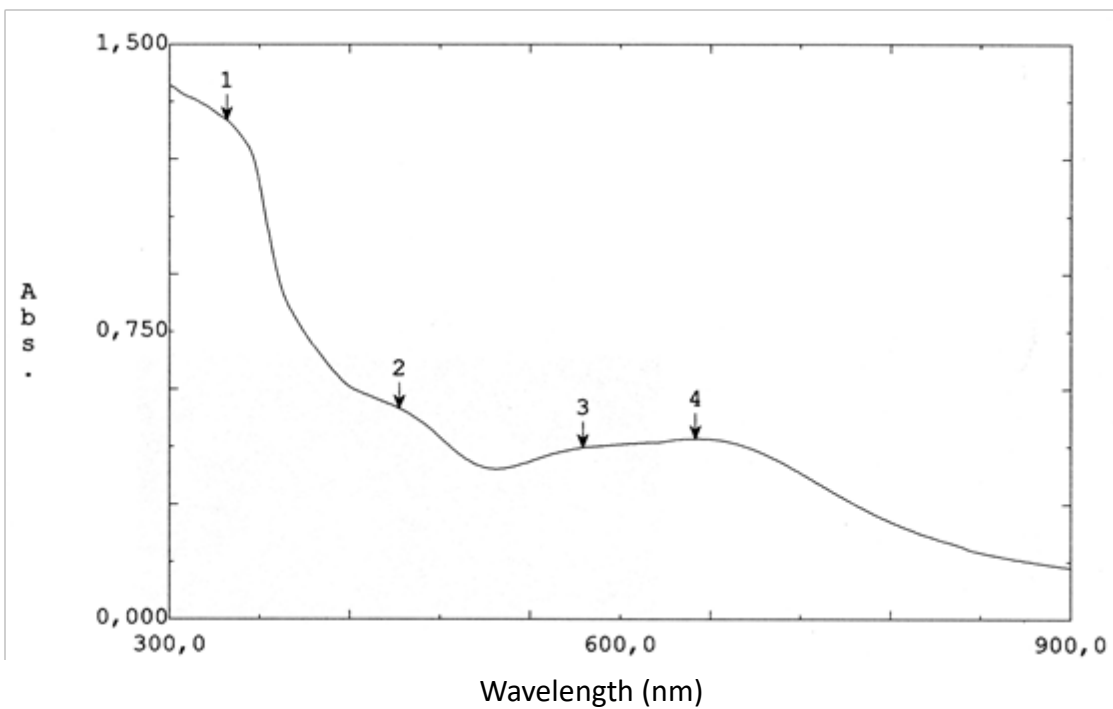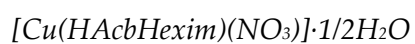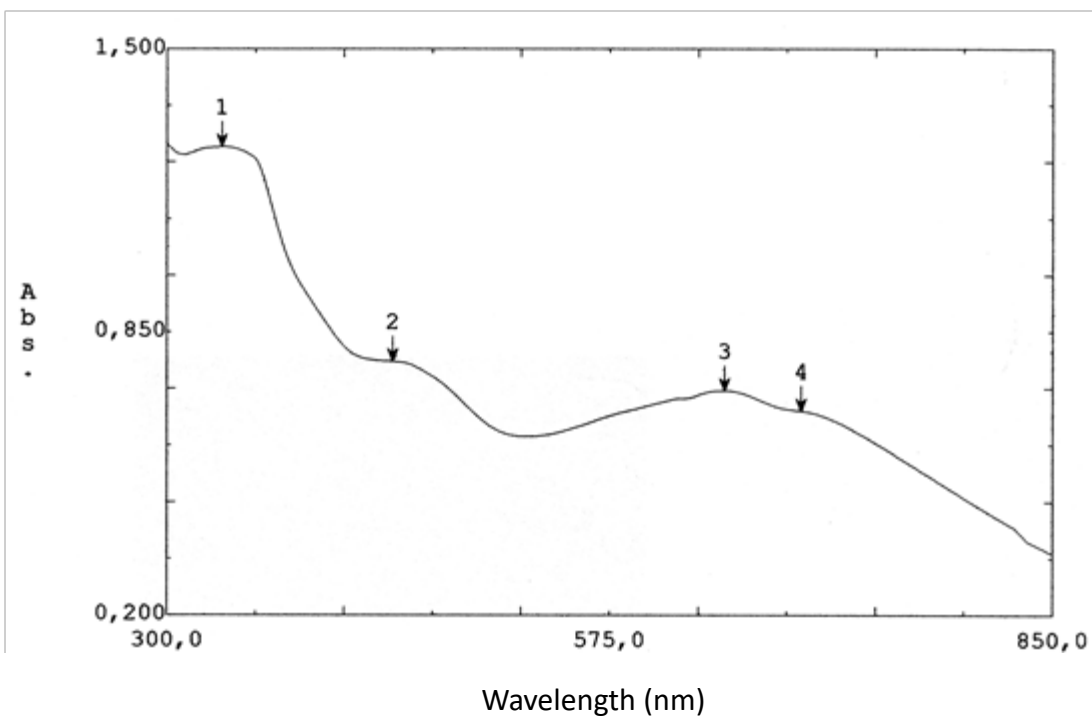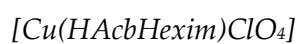

Figure S5. EPR spectra

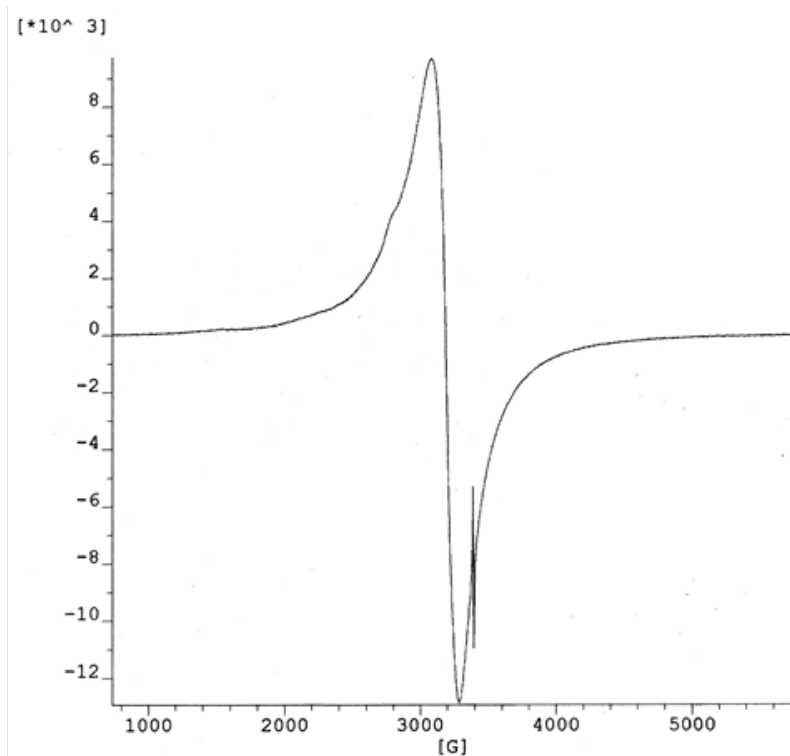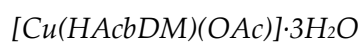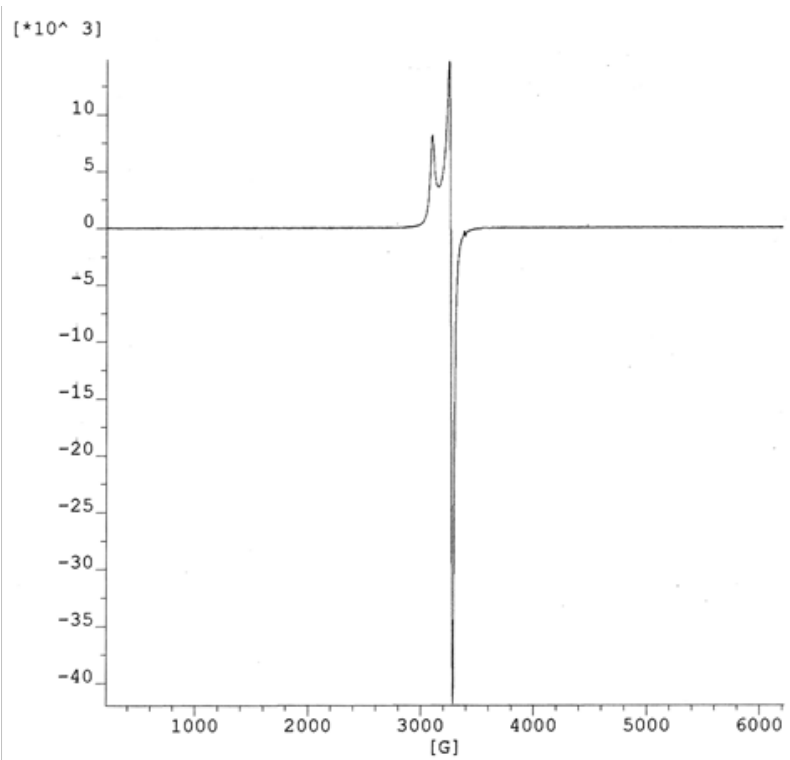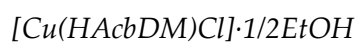

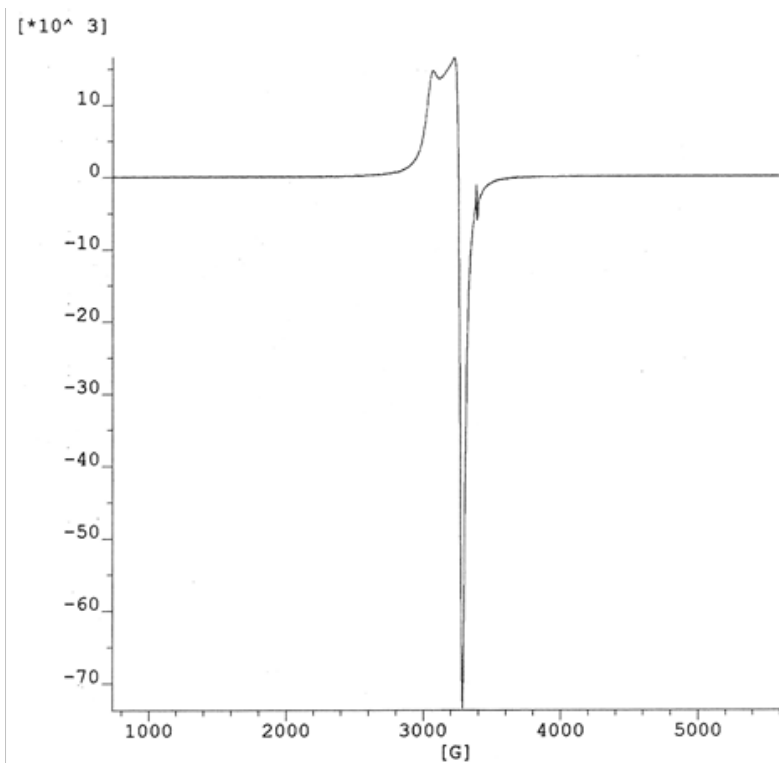

$[Cu(HAcbDM)(NO_3)]$

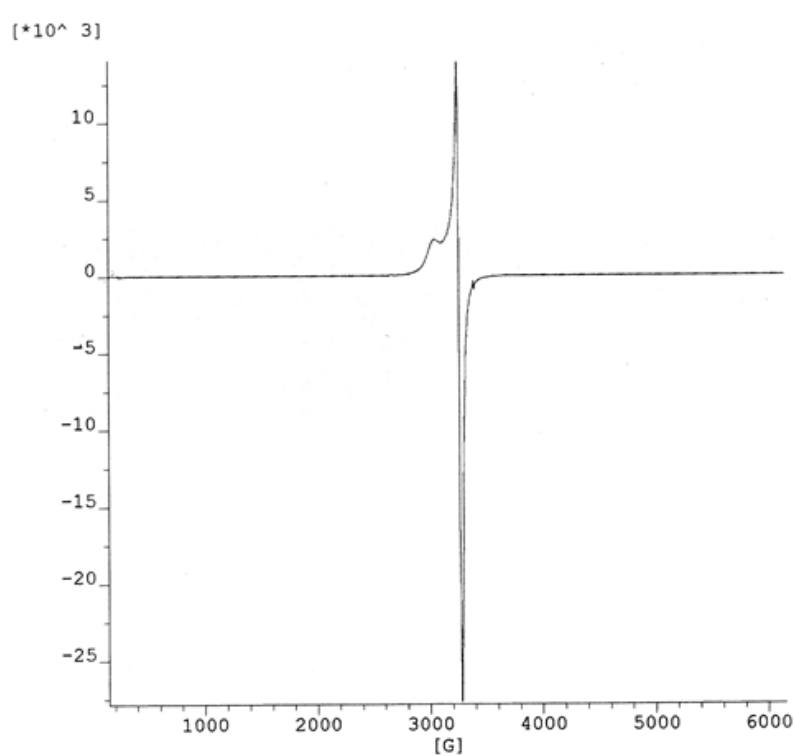

$[Cu(HAcbDM)(H_2O)_2]ClO_4$

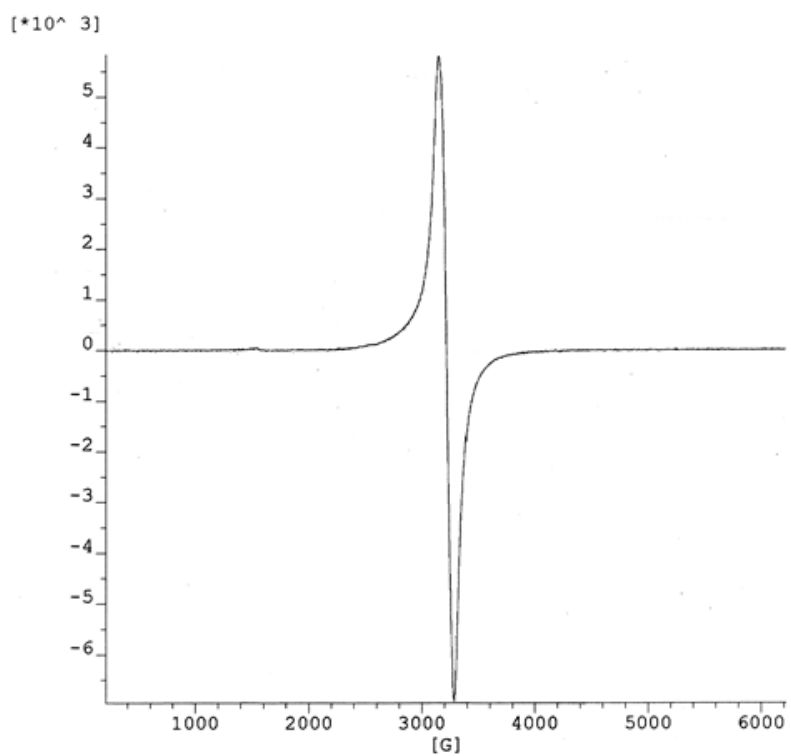

$[Cu(HAcHexim)(OAc)] \cdot 5H_2O$

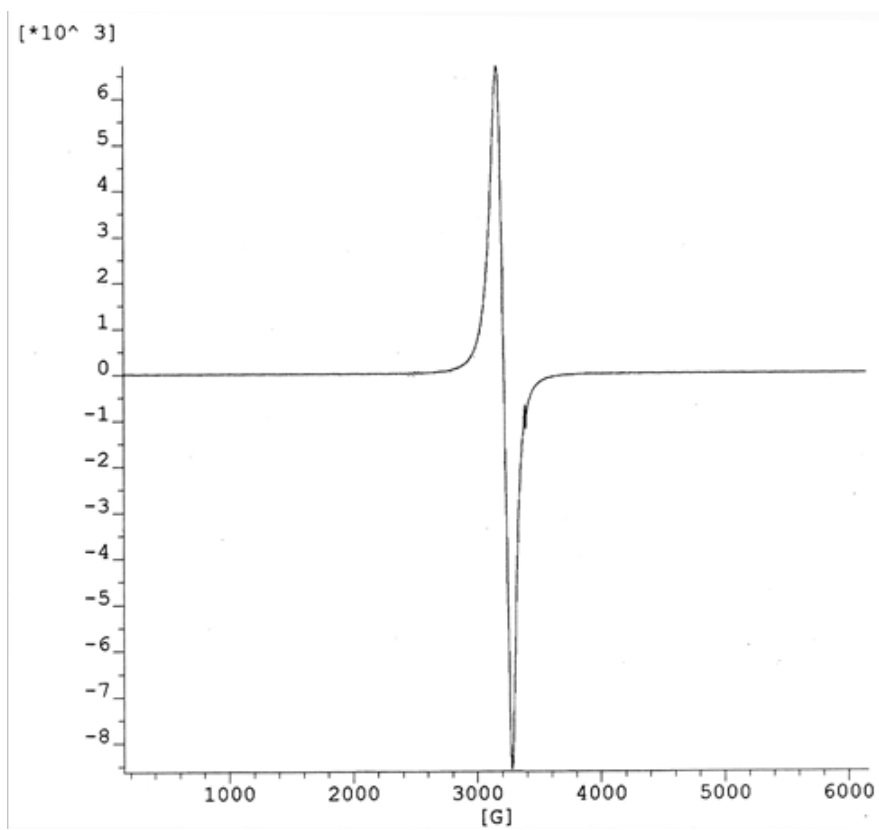

$[Cu(HAcHexim)Cl] \cdot 1/2EtOH$

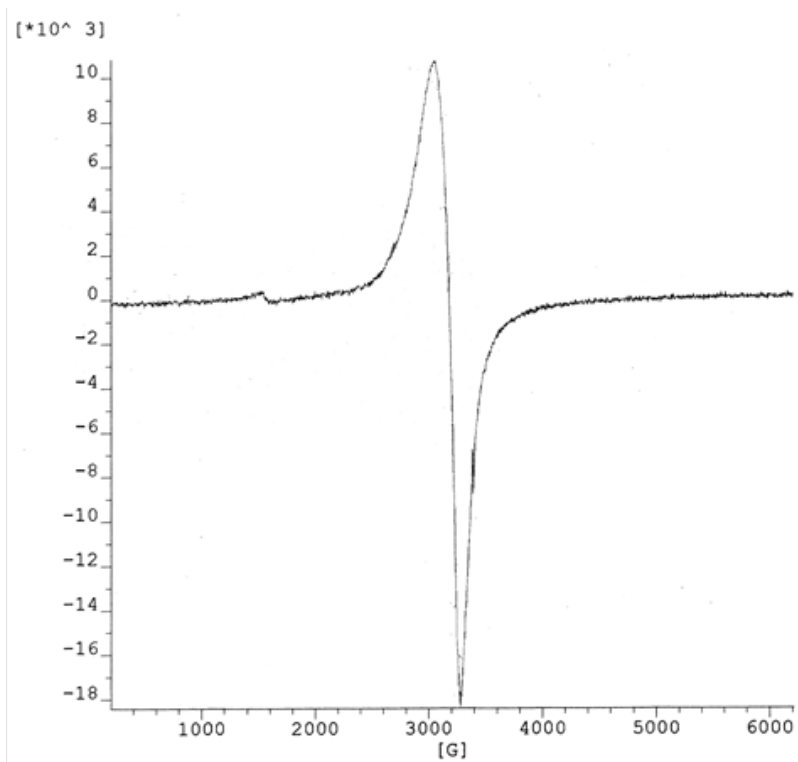

$[Cu(HAcHexim)(NO_3)] \cdot 1/2H_2O$

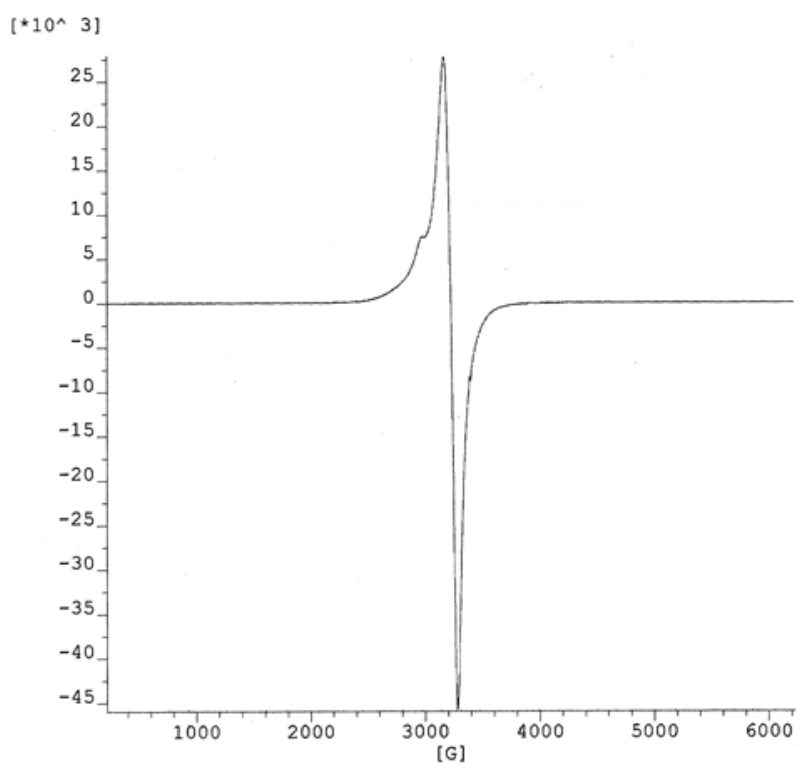

$[Cu(HAcHexim)ClO_4]$

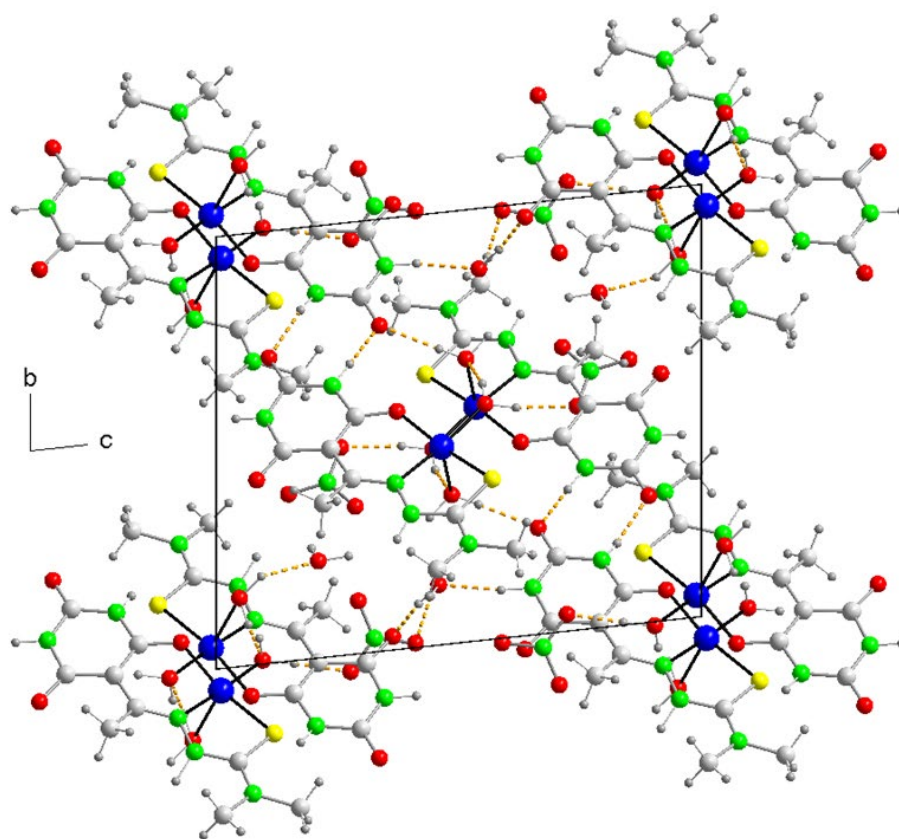

**Figure S6.** View of the unit cell for **3a** in the “bc” plane, showing the crystal packing. Hydrogen bonds are shown as orange dashed lines.

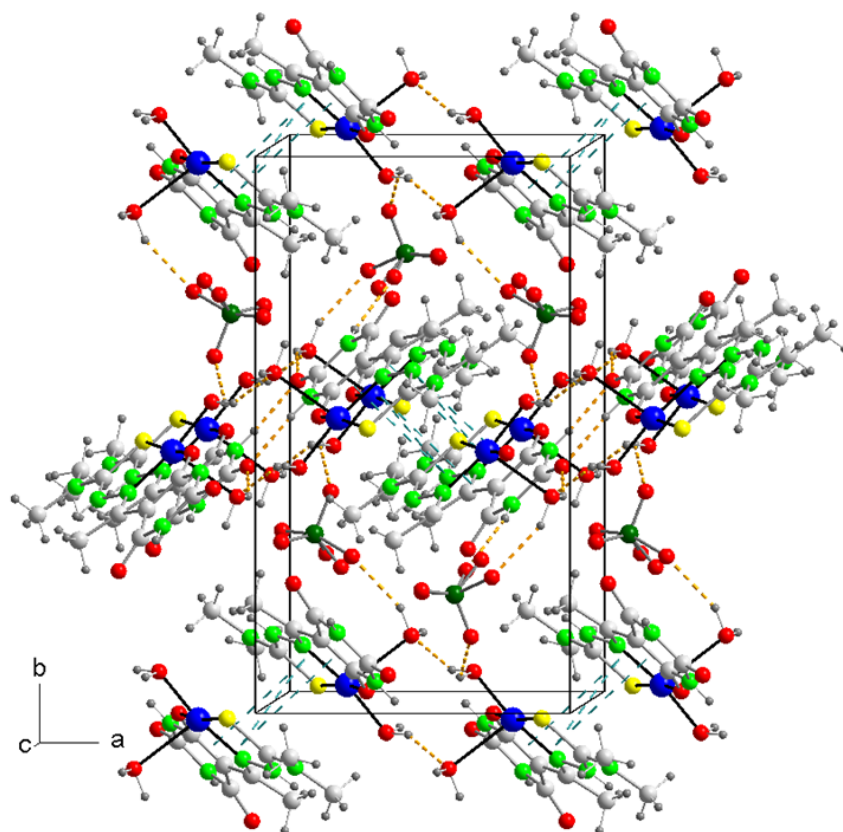

**Figure S7.** View of the unit cell for **4** in the “bc” plane, showing the crystal packing, the hydrogen bonding (orange dashed lines) and  $\pi$ - $\pi$  stacking interactions (blue dashed lines).

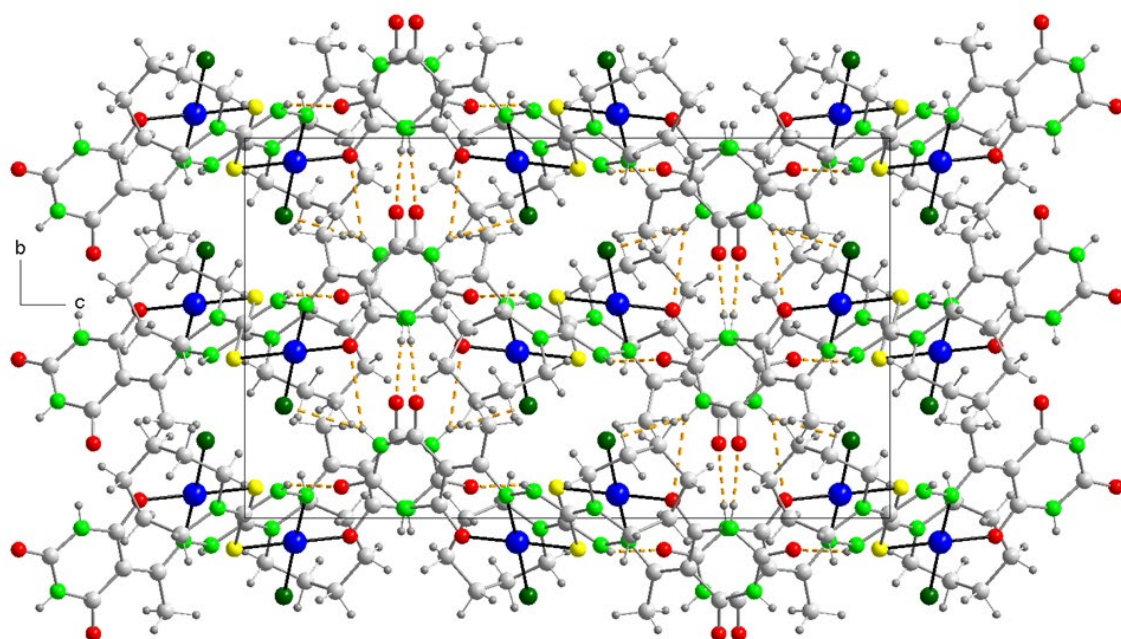

**Figure S8.** View of the unit cell for **6** in the “bc” plane, showing the crystal packing. Hydrogen bonds are shown as orange dashed lines.

**Figure S9.** Cyclic voltammograms

*[Cu(HAcbDM)(OAc)]·3H<sub>2</sub>O (1·3H<sub>2</sub>O)*

**E<sub>initial</sub>:** 0.900 V      **E<sub>vertex</sub>:** -2.199 V      **Speed:** 0.020 V/s  
**E<sub>final</sub>:** 0.900 V      **Delay:** 10 s

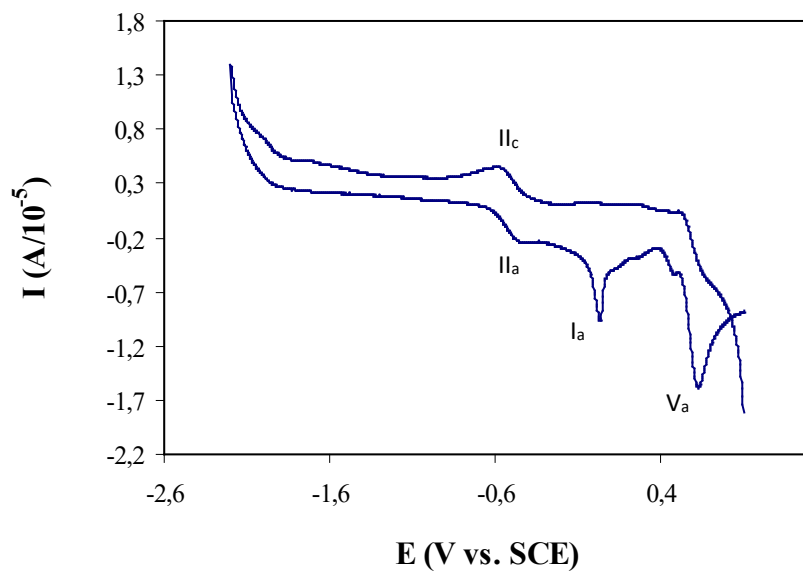

**Peak Potentials**

| System | $(E_p)_c$ | $(E_p)_a$ | $(E_p)_a - (E_p)_c$ | $[(E_p)_a + (E_p)_c]/2$ | $(E_{p/2})_c$ | $(E_{p/2})_c - (E_p)_c$ | $(E_{1/2})_c$ | $E^{0'}$ |
|--------|-----------|-----------|---------------------|-------------------------|---------------|-------------------------|---------------|----------|
| I:     |           | 0.033     |                     |                         |               |                         |               |          |
| II:    | -0.582    | -0.396    | 0.186               | -0.489                  | -0.471        | 0.111                   | -0.499        | -0.553   |
| V:     |           | 0.624     |                     |                         |               |                         |               |          |

$[Cu(HAc bDM)(OAc)] \cdot 3H_2O$  (1·3H<sub>2</sub>O)

**E<sub>initial</sub>:** 0.400 V

**E<sub>vertex</sub>:** -1.200 V

**Speed:** 0.200 V/s

**E<sub>final</sub>:** 0.400 V

**Delay:** 0 s

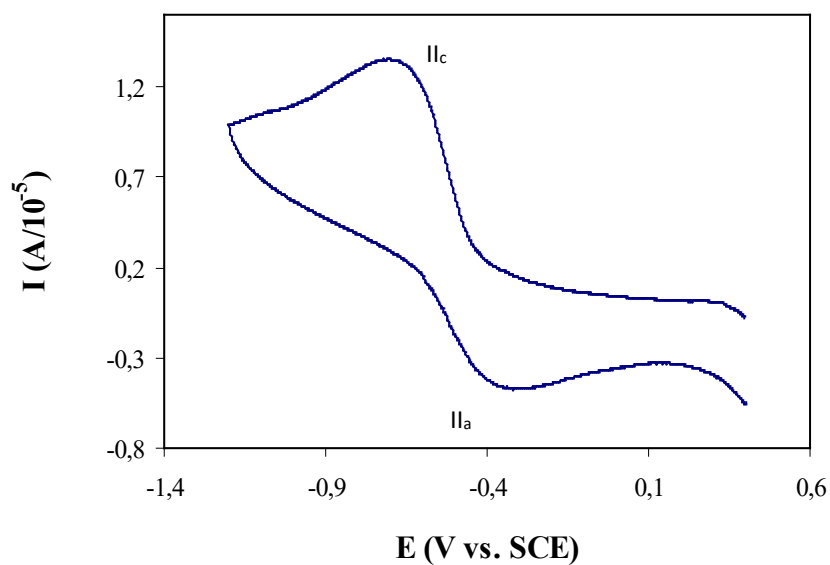

**Peak Potentials**

| System     | (E <sub>p</sub> ) <sub>c</sub> | (E <sub>p</sub> ) <sub>a</sub> | (E <sub>p</sub> ) <sub>a</sub> - (E <sub>p</sub> ) <sub>c</sub> | [(E <sub>p</sub> ) <sub>a</sub> + (E <sub>p</sub> ) <sub>c</sub> ]/2 | (E <sub>p/2</sub> ) <sub>c</sub> | (E <sub>p/2</sub> ) <sub>c</sub> - (E <sub>p</sub> ) <sub>c</sub> | (E <sub>1/2</sub> ) <sub>c</sub> | E <sup>0'</sup> |
|------------|--------------------------------|--------------------------------|-----------------------------------------------------------------|----------------------------------------------------------------------|----------------------------------|-------------------------------------------------------------------|----------------------------------|-----------------|
| <b>II:</b> | -0.708                         | -0.371                         | 0.337                                                           | -0.539                                                               | -0.518                           | 0.190                                                             | -0.545                           | -0.679          |

$[Cu(HAcbDM)(OAc)] \cdot 3H_2O$  (1·3H<sub>2</sub>O)

**E<sub>initial</sub>:** 0.900 V

**E<sub>vertex</sub>:** -1.098 V

**Speed:** 0.200 V/s

**E<sub>final</sub>:** 0.900 V

**Delay:** 10 s

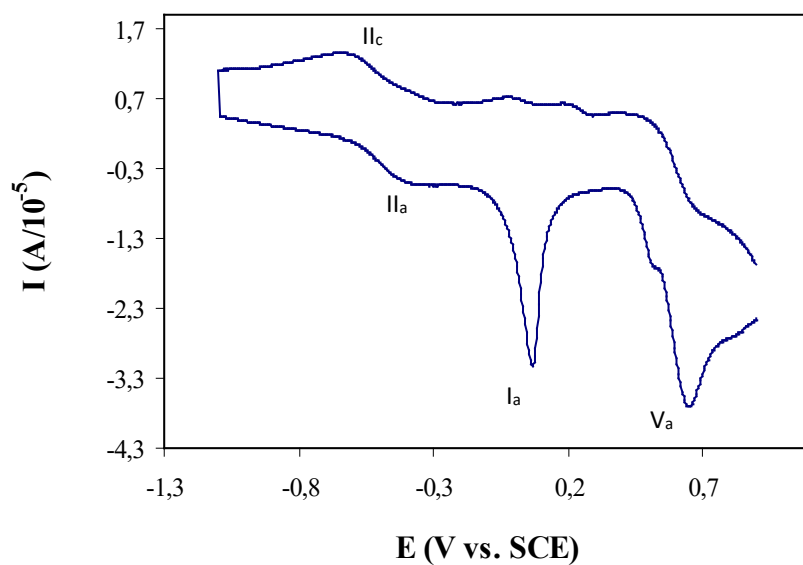

**(No peak potentials have been included)**

$[Cu(HAcbDM)(OAc)] \cdot 3H_2O$  (1:3H<sub>2</sub>O)

**E<sub>initial</sub>:** 0.900 V

**E<sub>vertex</sub>:** -0.999 V

**Speed:** 0.200 V/s

**E<sub>final</sub>:** 0.900 V

**Delay:** 10 s

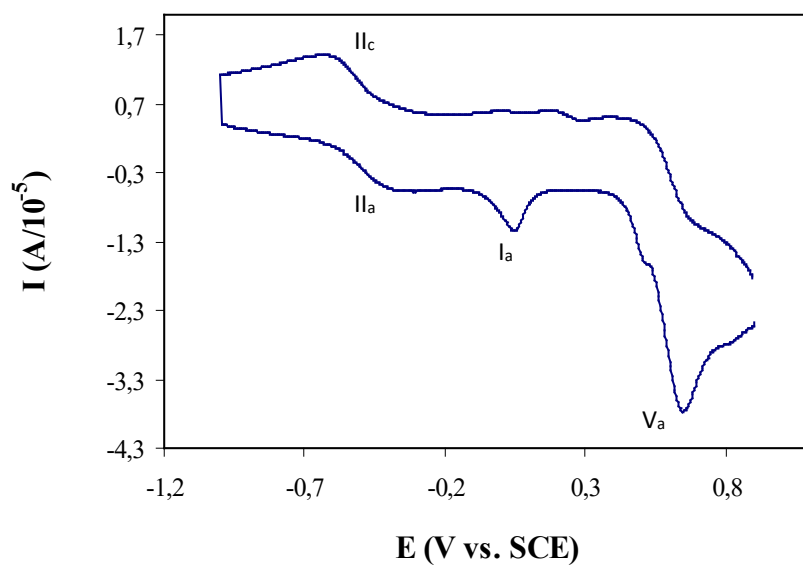

**(No peak potentials have been included)**

$[Cu(HAcbDM)(OAc)] \cdot 3H_2O$  (1.3H<sub>2</sub>O)

**E<sub>initial</sub>:** 0.900 V

**E<sub>vertex</sub>:** -0.300 V

**Speed:** 0.200 V/s

**E<sub>final</sub>:** 0.900 V

**Delay:** 0 s

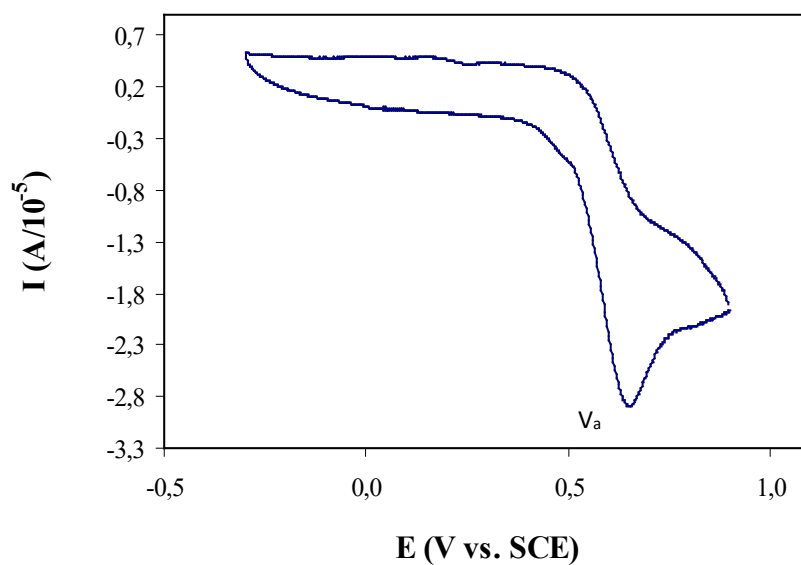

**Peak Potentials**

| System | (E <sub>p</sub> ) <sub>c</sub> | (E <sub>p</sub> ) <sub>a</sub> | (E <sub>p</sub> ) <sub>a</sub> - (E <sub>p</sub> ) <sub>c</sub> | [(E <sub>p</sub> ) <sub>a</sub> + (E <sub>p</sub> ) <sub>c</sub> ]/2 | (E <sub>p/2</sub> ) <sub>c</sub> | (E <sub>p/2</sub> ) <sub>c</sub> - (E <sub>p</sub> ) <sub>c</sub> | (E <sub>1/2</sub> ) <sub>c</sub> | E <sup>0'</sup> |
|--------|--------------------------------|--------------------------------|-----------------------------------------------------------------|----------------------------------------------------------------------|----------------------------------|-------------------------------------------------------------------|----------------------------------|-----------------|
| V:     |                                | 0.648                          |                                                                 |                                                                      |                                  |                                                                   |                                  |                 |

[Cu(HAc<sub>b</sub>DM)Cl]·1/2EtOH (2·1/2EtOH)

E<sub>initial</sub>: 0.900 V

E<sub>vertex</sub>: -2.000 V

Speed: 0.200 V/s

E<sub>final</sub>: 0.900 V

Delay: 0 s

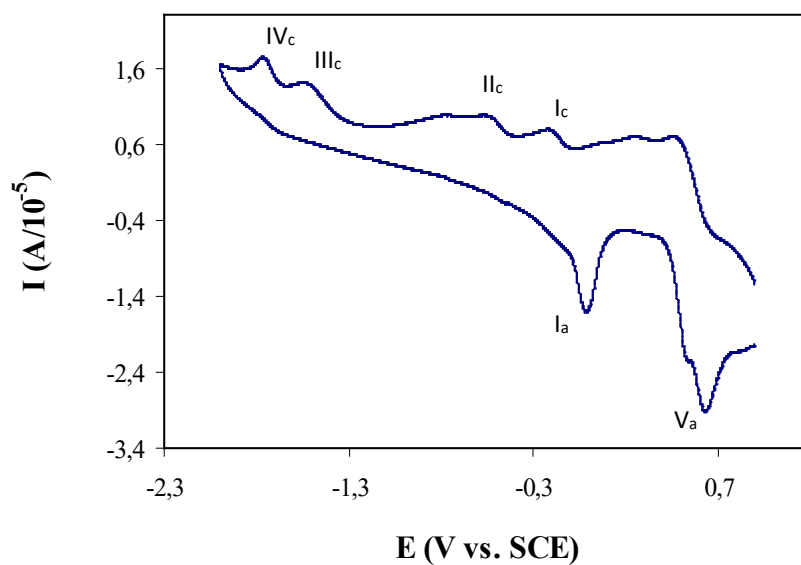

#### Peak Potentials

| System | (E <sub>p</sub> ) <sub>c</sub> | (E <sub>p</sub> ) <sub>a</sub> | (E <sub>p</sub> ) <sub>a</sub> - (E <sub>p</sub> ) <sub>c</sub> | [(E <sub>p</sub> ) <sub>a</sub> + (E <sub>p</sub> ) <sub>c</sub> ]/2 | (E <sub>p/2</sub> ) <sub>c</sub> | (E <sub>p/2</sub> ) <sub>c</sub> - (E <sub>p</sub> ) <sub>c</sub> | (E <sub>1/2</sub> ) <sub>c</sub> | E <sup>0'</sup> |
|--------|--------------------------------|--------------------------------|-----------------------------------------------------------------|----------------------------------------------------------------------|----------------------------------|-------------------------------------------------------------------|----------------------------------|-----------------|
| I:     | -0.216                         | -0.015                         | 0.201                                                           | -0.115                                                               | -0.156                           | 0.060                                                             | -0.184                           | -0.188          |
| II:    | -0.558                         |                                |                                                                 |                                                                      | -0.482                           | 0.076                                                             | -0.510                           | -0.530          |
| III:   | -1.534                         |                                |                                                                 |                                                                      | -1.428                           | 0.106                                                             | -1.456                           | -1.506          |
| IV:    | -1.766                         |                                |                                                                 |                                                                      | -1.714                           | 0.052                                                             | -1.741                           | -1.737          |
| V:     |                                | 0.631                          |                                                                 |                                                                      |                                  |                                                                   |                                  |                 |

[Cu(HAc<sub>b</sub>DM)Cl]·1/2EtOH (2·1/2EtOH)

E<sub>initial</sub>: 0.400 V

E<sub>vertex</sub>: -0.800 V

Speed: 0.200 V/s

E<sub>final</sub>: 0.400 V

Delay: 0 s

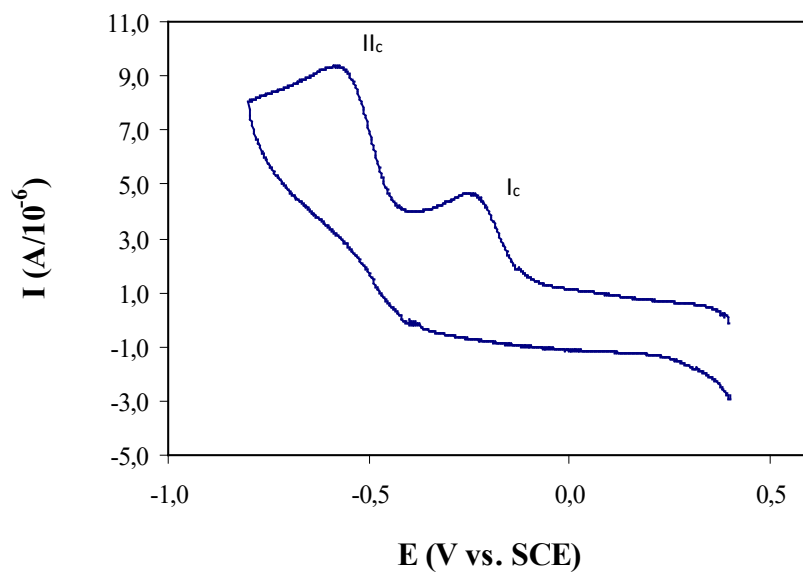

#### Peak Potentials

| System | (E <sub>p</sub> ) <sub>c</sub> | (E <sub>p</sub> ) <sub>a</sub> | (E <sub>p</sub> ) <sub>a</sub> - (E <sub>p</sub> ) <sub>c</sub> | [(E <sub>p</sub> ) <sub>a</sub> + (E <sub>p</sub> ) <sub>c</sub> ]/2 | (E <sub>p/2</sub> ) <sub>c</sub> | (E <sub>p/2</sub> ) <sub>c</sub> - (E <sub>p</sub> ) <sub>c</sub> | (E <sub>1/2</sub> ) <sub>c</sub> | E <sup>0'</sup> |
|--------|--------------------------------|--------------------------------|-----------------------------------------------------------------|----------------------------------------------------------------------|----------------------------------|-------------------------------------------------------------------|----------------------------------|-----------------|
| I:     | -0.234                         |                                |                                                                 |                                                                      | -0.170                           | 0.064                                                             | -0.197                           | -0.205          |
| II:    | -0.582                         |                                |                                                                 |                                                                      | -0.494                           | 0.088                                                             | -0.521                           | -0.553          |

[Cu(HAc<sub>b</sub>DM)Cl]·1/2EtOH (2·1/2EtOH)

E<sub>initial</sub>: 0.400 V

E<sub>vertex</sub>: -0.800 V

Speed: 0.200 V/s

E<sub>final</sub>: 0.400 V

Delay: 10 s

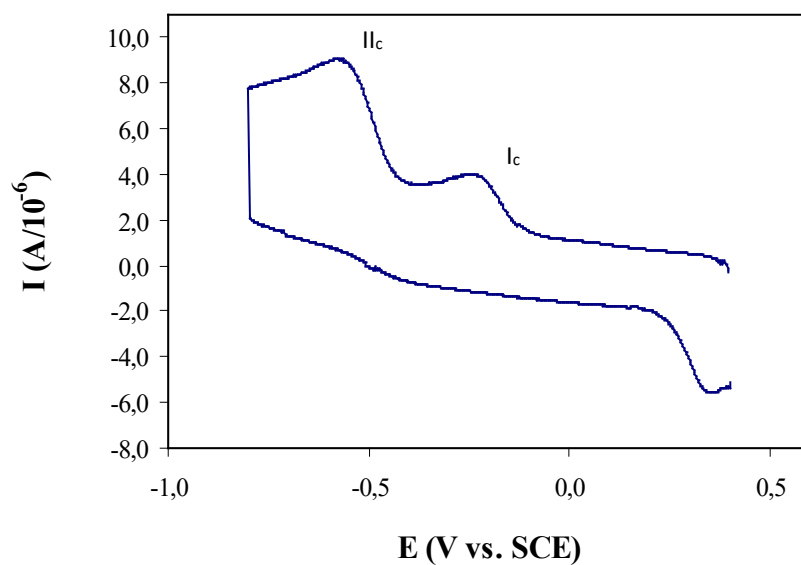

#### Peak Potentials

| System | (E <sub>p</sub> ) <sub>c</sub> | (E <sub>p</sub> ) <sub>a</sub> | (E <sub>p</sub> ) <sub>a</sub> - (E <sub>p</sub> ) <sub>c</sub> | [(E <sub>p</sub> ) <sub>a</sub> + (E <sub>p</sub> ) <sub>c</sub> ]/2 | (E <sub>p/2</sub> ) <sub>c</sub> | (E <sub>p/2</sub> ) <sub>c</sub> - (E <sub>p</sub> ) <sub>c</sub> | (E <sub>1/2</sub> ) <sub>c</sub> | E <sup>0'</sup> |
|--------|--------------------------------|--------------------------------|-----------------------------------------------------------------|----------------------------------------------------------------------|----------------------------------|-------------------------------------------------------------------|----------------------------------|-----------------|
| I:     | -0.238                         |                                |                                                                 |                                                                      | -0.168                           | 0.070                                                             | -0.195                           | -0.209          |
| II:    | -0.576                         |                                |                                                                 |                                                                      | -0.490                           | 0.086                                                             | -0.517                           | -0.547          |

[Cu(HAc<sub>b</sub>DM)Cl]·1/2EtOH (2·1/2EtOH)

**E<sub>initial</sub>:** 0.400 V

**E<sub>vertex</sub>:** -1.300 V

**Speed:** 0.200 V/s

**E<sub>final</sub>:** 0.400 V

**Delay:** 10 s

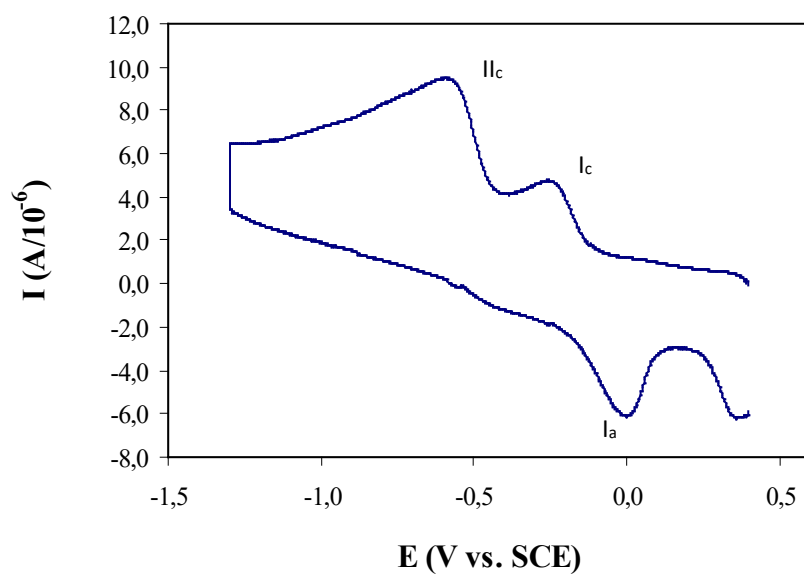

**Peak Potentials**

| System | (E <sub>p</sub> ) <sub>c</sub> | (E <sub>p</sub> ) <sub>a</sub> | (E <sub>p</sub> ) <sub>a</sub> - (E <sub>p</sub> ) <sub>c</sub> | [(E <sub>p</sub> ) <sub>a</sub> + (E <sub>p</sub> ) <sub>c</sub> ]/2 | (E <sub>p/2</sub> ) <sub>c</sub> | (E <sub>p/2</sub> ) <sub>c</sub> - (E <sub>p</sub> ) <sub>c</sub> | (E <sub>1/2</sub> ) <sub>c</sub> | E <sup>0'</sup> |
|--------|--------------------------------|--------------------------------|-----------------------------------------------------------------|----------------------------------------------------------------------|----------------------------------|-------------------------------------------------------------------|----------------------------------|-----------------|
| I:     | -0.256                         | -0.007                         | 0.249                                                           | -0.131                                                               | -0.174                           | 0.082                                                             | -0.201                           | -0.227          |
| II:    | -0.588                         |                                |                                                                 |                                                                      | -0.494                           | 0.094                                                             | -0.521                           | -0.559          |

[Cu(HAc<sub>b</sub>DM)(NO<sub>3</sub>)] (3)

E<sub>initial</sub>: 0.900 V

E<sub>vertex</sub>: -2.199 V

Speed: 0.200 V/s

E<sub>final</sub>: 0.900 V

Delay: 0 s

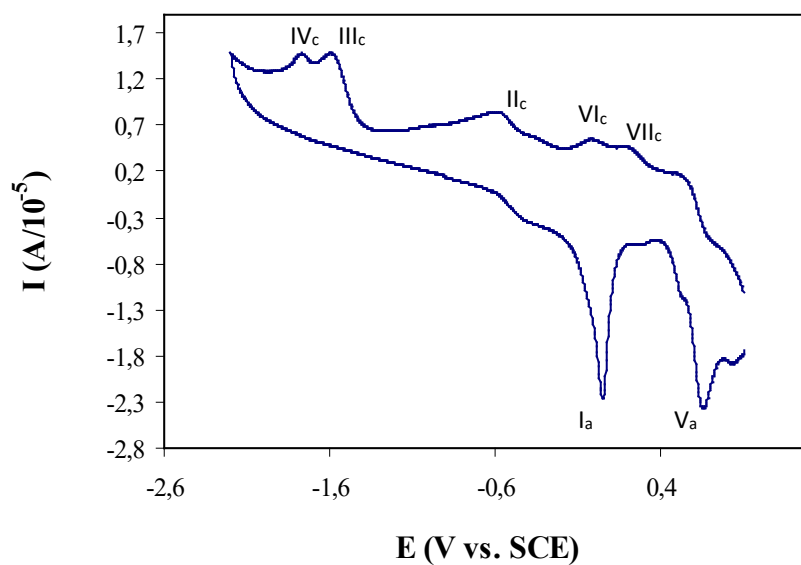

#### Peak Potentials

| System | (E <sub>p</sub> ) <sub>c</sub> | (E <sub>p</sub> ) <sub>a</sub> | (E <sub>p</sub> ) <sub>a</sub> - (E <sub>p</sub> ) <sub>c</sub> | [(E <sub>p</sub> ) <sub>a</sub> + (E <sub>p</sub> ) <sub>c</sub> ]/2 | (E <sub>p/2</sub> ) <sub>c</sub> | (E <sub>p/2</sub> ) <sub>c</sub> - (E <sub>p</sub> ) <sub>c</sub> | (E <sub>1/2</sub> ) <sub>c</sub> | E <sup>0'</sup> |
|--------|--------------------------------|--------------------------------|-----------------------------------------------------------------|----------------------------------------------------------------------|----------------------------------|-------------------------------------------------------------------|----------------------------------|-----------------|
| I:     |                                | 0.048                          |                                                                 |                                                                      |                                  |                                                                   |                                  |                 |
| II:    | -0.597                         |                                |                                                                 |                                                                      | -0.465                           | 0.132                                                             | -0.493                           | -0.569          |
| III:   | -1.593                         |                                |                                                                 |                                                                      | -1.497                           | 0.096                                                             | -1.525                           | -1.565          |
| IV:    | -1.77                          |                                |                                                                 |                                                                      | -1.71                            | 0.060                                                             | -1.738                           | -1.742          |
| V:     |                                | 0.651                          |                                                                 |                                                                      |                                  |                                                                   |                                  |                 |
| VI:    | 0.20                           |                                |                                                                 |                                                                      | 0.282                            | 0.081                                                             | 0.254                            | 0.230           |
| VII:   | -0.036                         |                                |                                                                 |                                                                      | 0.045                            | 0.081                                                             | 0.017                            | -0.007          |

[Cu(HAcbDM)(NO<sub>3</sub>)] (3)

E<sub>initial</sub>: 0.400 V

E<sub>vertex</sub>: -1.300 V

Speed: 0.200 V/s

E<sub>final</sub>: 0.400 V

Delay: 0 s

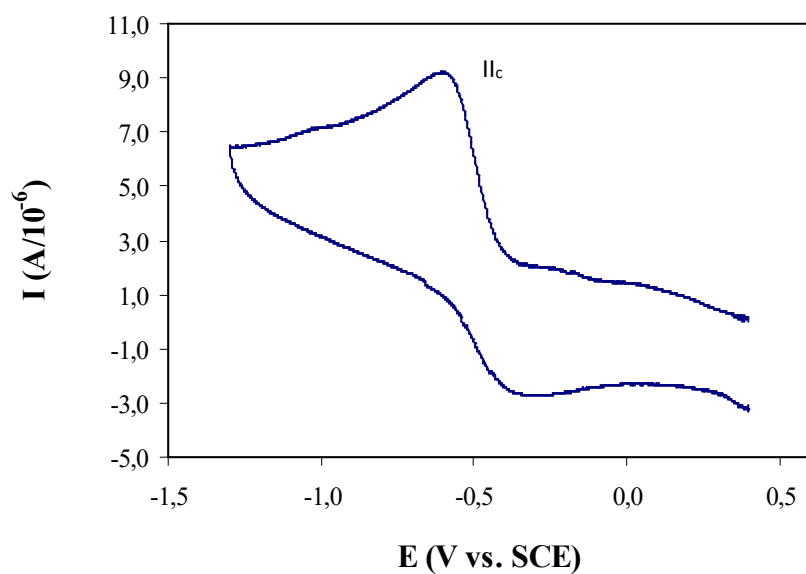

**Peak Potentials**

| System | (E <sub>p</sub> ) <sub>c</sub> | (E <sub>p</sub> ) <sub>a</sub> | (E <sub>p</sub> ) <sub>a</sub> - (E <sub>p</sub> ) <sub>c</sub> | [(E <sub>p</sub> ) <sub>a</sub> + (E <sub>p</sub> ) <sub>c</sub> ]/2 | (E <sub>p/2</sub> ) <sub>c</sub> | (E <sub>p/2</sub> ) <sub>c</sub> - (E <sub>p</sub> ) <sub>c</sub> | (E <sub>1/2</sub> ) <sub>c</sub> | E <sup>0'</sup> |
|--------|--------------------------------|--------------------------------|-----------------------------------------------------------------|----------------------------------------------------------------------|----------------------------------|-------------------------------------------------------------------|----------------------------------|-----------------|
| II:    | -0.596                         |                                |                                                                 |                                                                      | -0.492                           | 0.104                                                             | -0.519                           | -0.567          |

[Cu(HAcbDM)(NO<sub>3</sub>)] (3)

E<sub>initial</sub>: 0.400 V

E<sub>vertex</sub>: -1.300 V

Speed: 0.200 V/s

E<sub>final</sub>: 0.400 V

Delay: 10 s

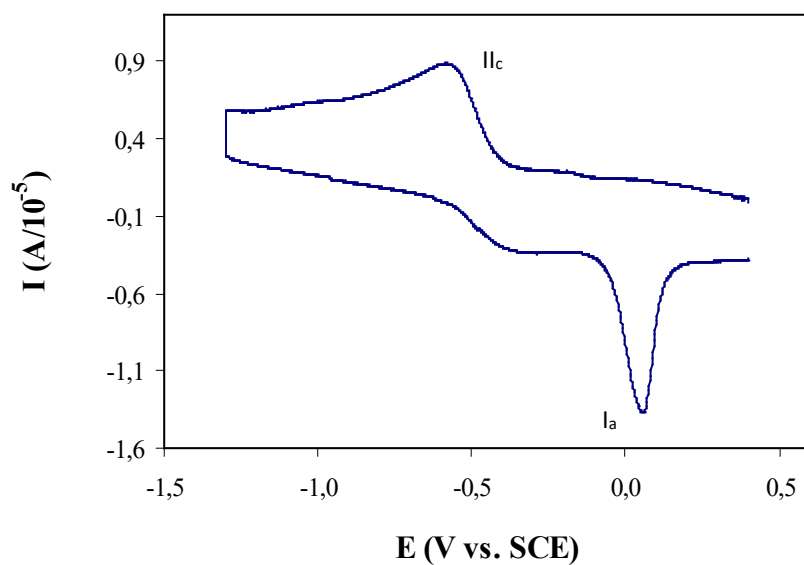

#### Peak Potentials

| System | (E <sub>p</sub> ) <sub>c</sub> | (E <sub>p</sub> ) <sub>a</sub> | (E <sub>p</sub> ) <sub>a</sub> - (E <sub>p</sub> ) <sub>c</sub> | [(E <sub>p</sub> ) <sub>a</sub> + (E <sub>p</sub> ) <sub>c</sub> ]/2 | (E <sub>p/2</sub> ) <sub>c</sub> | (E <sub>p/2</sub> ) <sub>c</sub> - (E <sub>p</sub> ) <sub>c</sub> | (E <sub>1/2</sub> ) <sub>c</sub> | E <sup>0'</sup> |
|--------|--------------------------------|--------------------------------|-----------------------------------------------------------------|----------------------------------------------------------------------|----------------------------------|-------------------------------------------------------------------|----------------------------------|-----------------|
| I:     |                                | 0.057                          |                                                                 |                                                                      |                                  |                                                                   |                                  |                 |
| II:    | -0.580                         |                                |                                                                 |                                                                      | -0.482                           | 0.098                                                             | -0.509                           | -0.551          |

[Cu(HAcbDM)(NO<sub>3</sub>)] (3)

E<sub>initial</sub>: 0.400 V

E<sub>vertex</sub>: -0.900 V

Speed: 0.200 V/s

E<sub>final</sub>: 0.400 V

Delay: 10 s

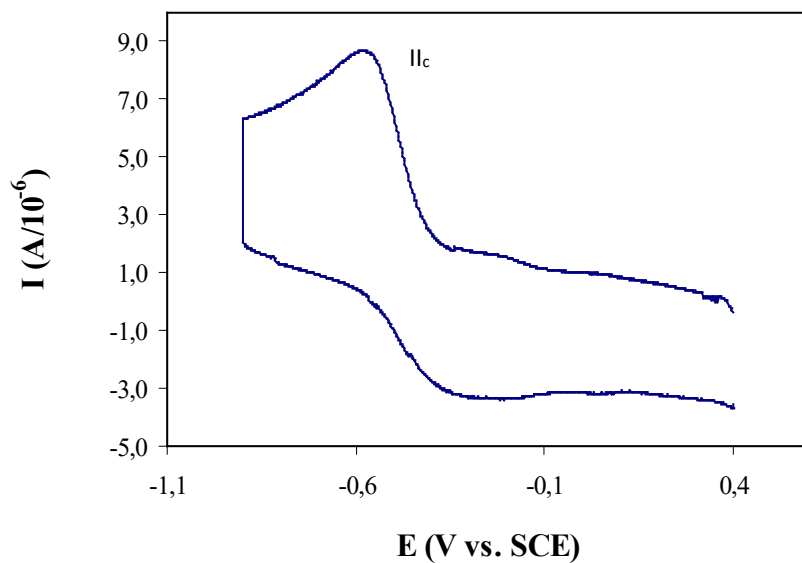

**Peak Potentials**

| System | (E <sub>p</sub> ) <sub>c</sub> | (E <sub>p</sub> ) <sub>a</sub> | (E <sub>p</sub> ) <sub>a</sub> - (E <sub>p</sub> ) <sub>c</sub> | [(E <sub>p</sub> ) <sub>a</sub> + (E <sub>p</sub> ) <sub>c</sub> ]/2 | (E <sub>p/2</sub> ) <sub>c</sub> | (E <sub>p/2</sub> ) <sub>c</sub> - (E <sub>p</sub> ) <sub>c</sub> | (E <sub>1/2</sub> ) <sub>c</sub> | E <sup>0'</sup> |
|--------|--------------------------------|--------------------------------|-----------------------------------------------------------------|----------------------------------------------------------------------|----------------------------------|-------------------------------------------------------------------|----------------------------------|-----------------|
| II:    | -0.580                         |                                |                                                                 |                                                                      | -0.478                           | 0.102                                                             | -0.505                           | -0.551          |

[Cu(HAc<sub>6</sub>Hexim)Cl]·1/2EtOH (6·1/2EtOH)

E<sub>initial</sub>: 0.400 V

E<sub>vertex</sub>: -2.200 V

Speed: 0.020 V/s

E<sub>final</sub>: 0.400 V

Delay: 0 s

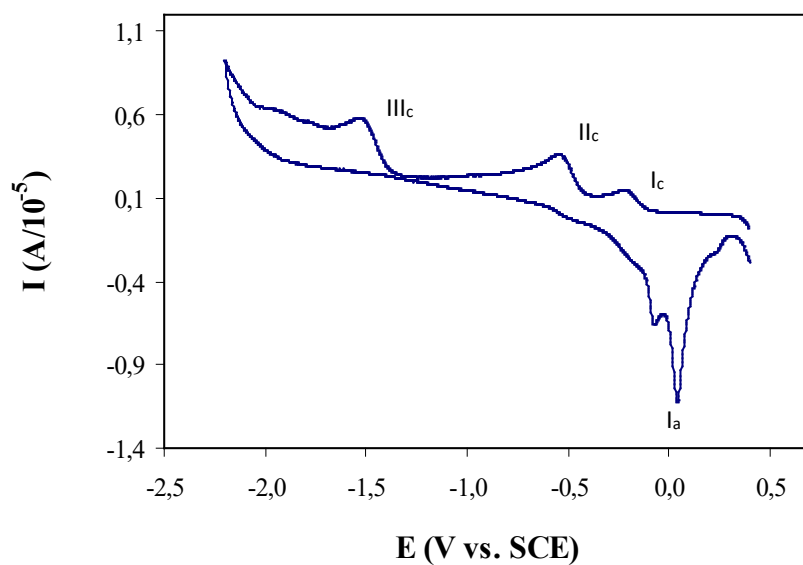

#### Peak Potentials

| System | (E <sub>p</sub> ) <sub>c</sub> | (E <sub>p</sub> ) <sub>a</sub> | (E <sub>p</sub> ) <sub>a</sub> - (E <sub>p</sub> ) <sub>c</sub> | [(E <sub>p</sub> ) <sub>a</sub> + (E <sub>p</sub> ) <sub>c</sub> ]/2 | (E <sub>p/2</sub> ) <sub>c</sub> | (E <sub>p/2</sub> ) <sub>c</sub> - (E <sub>p</sub> ) <sub>c</sub> | (E <sub>1/2</sub> ) <sub>c</sub> | E <sup>0'</sup> |
|--------|--------------------------------|--------------------------------|-----------------------------------------------------------------|----------------------------------------------------------------------|----------------------------------|-------------------------------------------------------------------|----------------------------------|-----------------|
| I:     | -0.216                         | 0.046                          | 0.262                                                           | -0.085                                                               | -0.156                           | 0.060                                                             | -0.184                           | -0.188          |
| II:    | -0.540                         |                                |                                                                 |                                                                      | -0.476                           | 0.064                                                             | -0.504                           | -0.511          |
| III:   | -1.546                         |                                |                                                                 |                                                                      | -1.444                           | 0.102                                                             | -1.472                           | -1.518          |

[Cu(HAc<sub>6</sub>Hexim)Cl]·1/2EtOH (6·1/2EtOH)

E<sub>initial</sub>: 0.400 V

E<sub>vertex</sub>: -1.200 V

Speed: 0.200 V/s

E<sub>final</sub>: 0.400 V

Delay: 0 s

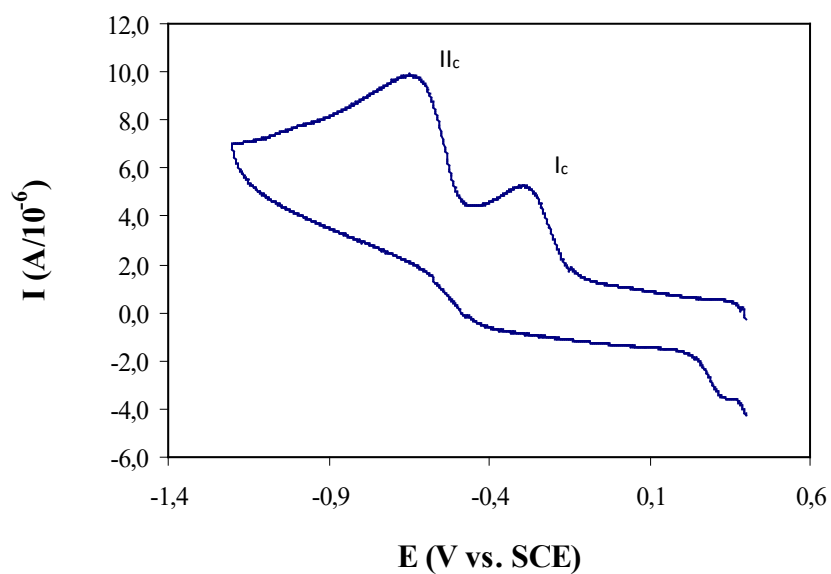

#### Peak Potentials

| System | (E <sub>p</sub> ) <sub>c</sub> | (E <sub>p</sub> ) <sub>a</sub> | (E <sub>p</sub> ) <sub>a</sub> - (E <sub>p</sub> ) <sub>c</sub> | [(E <sub>p</sub> ) <sub>a</sub> + (E <sub>p</sub> ) <sub>c</sub> ]/2 | (E <sub>p/2</sub> ) <sub>c</sub> | (E <sub>p/2</sub> ) <sub>c</sub> - (E <sub>p</sub> ) <sub>c</sub> | (E <sub>1/2</sub> ) <sub>c</sub> | E <sup>0'</sup> |
|--------|--------------------------------|--------------------------------|-----------------------------------------------------------------|----------------------------------------------------------------------|----------------------------------|-------------------------------------------------------------------|----------------------------------|-----------------|
| I:     | -0.294                         | -0.265                         | 0.029                                                           | -0.280                                                               | -0.206                           | 0.088                                                             | -0.233                           | -0.265          |
| II:    | -0.646                         | -0.617                         | 0.029                                                           | -0.632                                                               | -0.544                           | 0.102                                                             | -0.571                           | -0.617          |

[Cu(HAc<sub>6</sub>Hexim)Cl]·1/2EtOH (6·1/2EtOH)

E<sub>initial</sub>: 0.400 V

E<sub>vertex</sub>: -0.800 V

Speed: 0.200 V/s

E<sub>final</sub>: 0.400 V

Delay: 0 s

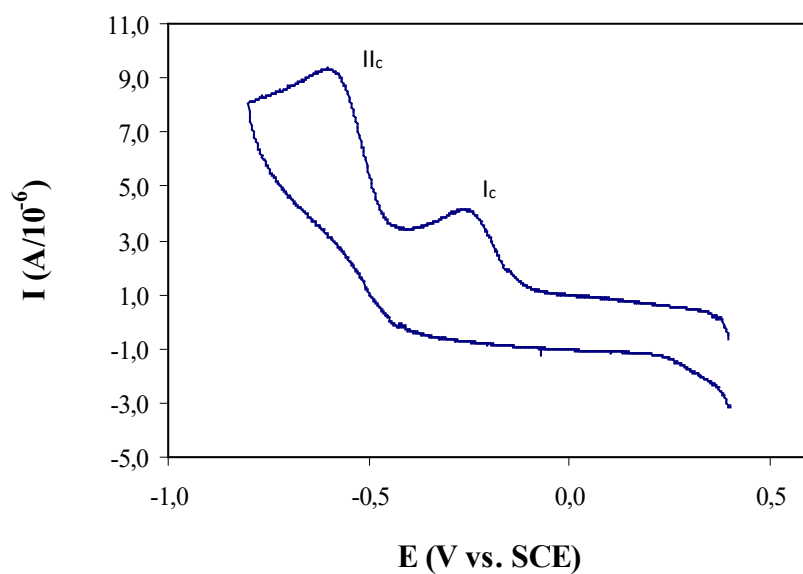

#### Peak Potentials

| System | (E <sub>p</sub> ) <sub>c</sub> | (E <sub>p</sub> ) <sub>a</sub> | (E <sub>p</sub> ) <sub>a</sub> - (E <sub>p</sub> ) <sub>c</sub> | [(E <sub>p</sub> ) <sub>a</sub> + (E <sub>p</sub> ) <sub>c</sub> ]/2 | (E <sub>p/2</sub> ) <sub>c</sub> | (E <sub>p/2</sub> ) <sub>c</sub> - (E <sub>p</sub> ) <sub>c</sub> | (E <sub>1/2</sub> ) <sub>c</sub> | E <sup>0'</sup> |
|--------|--------------------------------|--------------------------------|-----------------------------------------------------------------|----------------------------------------------------------------------|----------------------------------|-------------------------------------------------------------------|----------------------------------|-----------------|
| I:     | -0.250                         | -0.604                         | -0.354                                                          | -0.427                                                               | -0.184                           | 0.066                                                             | -0.211                           | -0.221          |
| II:    | -0.604                         | -0.516                         | 0.088                                                           | -0.560                                                               | -0.516                           | 0.088                                                             | -0.543                           | -0.575          |

[Cu(HAc<sub>6</sub>Hexim)Cl]·1/2EtOH (6·1/2EtOH)

**E<sub>initial</sub>:** 0.400 V

**E<sub>vertex</sub>:** -0.800 V

**Speed:** 0.200 V/s

**E<sub>final</sub>:** 0.400 V

**Delay:** 10 s

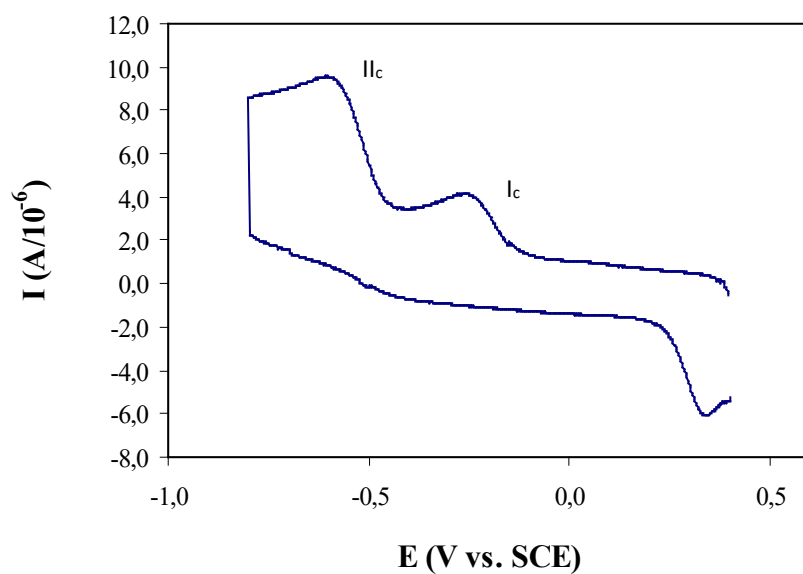

**Peak Potentials**

| System | (E <sub>p</sub> ) <sub>c</sub> | (E <sub>p</sub> ) <sub>a</sub> | (E <sub>p</sub> ) <sub>a</sub> - (E <sub>p</sub> ) <sub>c</sub> | [(E <sub>p</sub> ) <sub>a</sub> + (E <sub>p</sub> ) <sub>c</sub> ]/2 | (E <sub>p/2</sub> ) <sub>c</sub> | (E <sub>p/2</sub> ) <sub>c</sub> - (E <sub>p</sub> ) <sub>c</sub> | (E <sub>1/2</sub> ) <sub>c</sub> | E <sup>0'</sup> |
|--------|--------------------------------|--------------------------------|-----------------------------------------------------------------|----------------------------------------------------------------------|----------------------------------|-------------------------------------------------------------------|----------------------------------|-----------------|
| I:     | -0.260                         |                                |                                                                 |                                                                      | -0.186                           | 0.074                                                             | -0.213                           | -0.231          |
| II:    | -0.610                         |                                |                                                                 |                                                                      | -0.516                           | 0.094                                                             | -0.543                           | -0.581          |

[Cu(HAc<sub>6</sub>Hexim)Cl]·1/2EtOH (6·1/2EtOH)

E<sub>initial</sub>: 0.400 V

E<sub>vertex</sub>: -0.400 V

Speed: 0.200 V/s

E<sub>final</sub>: 0.400 V

Delay: 10 s

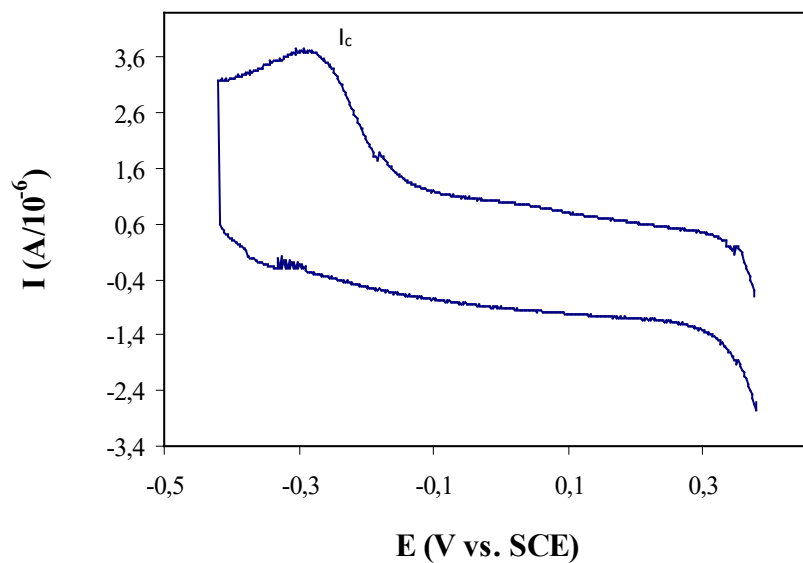

#### Peak Potentials

| System | (E <sub>p</sub> ) <sub>c</sub> | (E <sub>p</sub> ) <sub>a</sub> | (E <sub>p</sub> ) <sub>a</sub> - (E <sub>p</sub> ) <sub>c</sub> | [(E <sub>p</sub> ) <sub>a</sub> + (E <sub>p</sub> ) <sub>c</sub> ]/2 | (E <sub>p/2</sub> ) <sub>c</sub> | (E <sub>p/2</sub> ) <sub>c</sub> - (E <sub>p</sub> ) <sub>c</sub> | (E <sub>1/2</sub> ) <sub>c</sub> | E <sup>0'</sup> |
|--------|--------------------------------|--------------------------------|-----------------------------------------------------------------|----------------------------------------------------------------------|----------------------------------|-------------------------------------------------------------------|----------------------------------|-----------------|
| I:     | -0.272                         |                                |                                                                 |                                                                      | -0.192                           | 0.080                                                             | -0.219                           | -0.243          |

[Cu(HAcHexim)(NO<sub>3</sub>)]·1/2H<sub>2</sub>O (7·1/2H<sub>2</sub>O)

E<sub>initial</sub>: 0.900 V

E<sub>vertex</sub>: -2.199 V

Speed: 0.200 V/s

E<sub>final</sub>: 0.900 V

Delay: 0 s

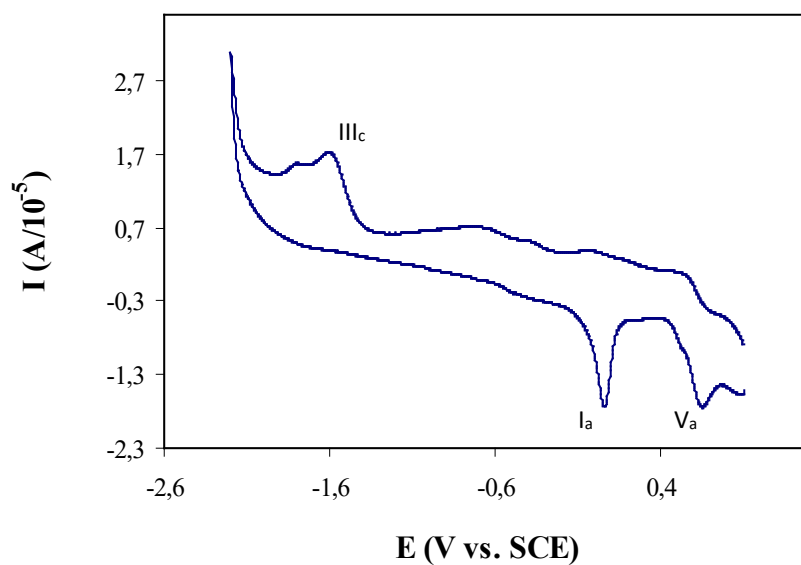

#### Peak Potentials

| System | (E <sub>p</sub> ) <sub>c</sub> | (E <sub>p</sub> ) <sub>a</sub> | (E <sub>p</sub> ) <sub>a</sub> - (E <sub>p</sub> ) <sub>c</sub> | [(E <sub>p</sub> ) <sub>a</sub> + (E <sub>p</sub> ) <sub>c</sub> ]/2 | (E <sub>p/2</sub> ) <sub>c</sub> | (E <sub>p/2</sub> ) <sub>c</sub> - (E <sub>p</sub> ) <sub>c</sub> | (E <sub>1/2</sub> ) <sub>c</sub> | E <sup>0'</sup> |
|--------|--------------------------------|--------------------------------|-----------------------------------------------------------------|----------------------------------------------------------------------|----------------------------------|-------------------------------------------------------------------|----------------------------------|-----------------|
| I:     |                                | 0.060                          |                                                                 |                                                                      |                                  |                                                                   |                                  |                 |
| III:   | -1.602                         |                                |                                                                 |                                                                      | -1.497                           | 0.105                                                             | -1.525                           | -1.573          |
| V:     |                                | 0.651                          |                                                                 |                                                                      |                                  |                                                                   |                                  |                 |

[Cu(HAc<sub>6</sub>Hexim)(NO<sub>3</sub>)]·1/2H<sub>2</sub>O (7·1/2H<sub>2</sub>O)

E<sub>initial</sub>: 0.400 V

E<sub>vertex</sub>: -1.100 V

Speed: 0.200 V/s

E<sub>final</sub>: 0.898 V

Delay: 0 s

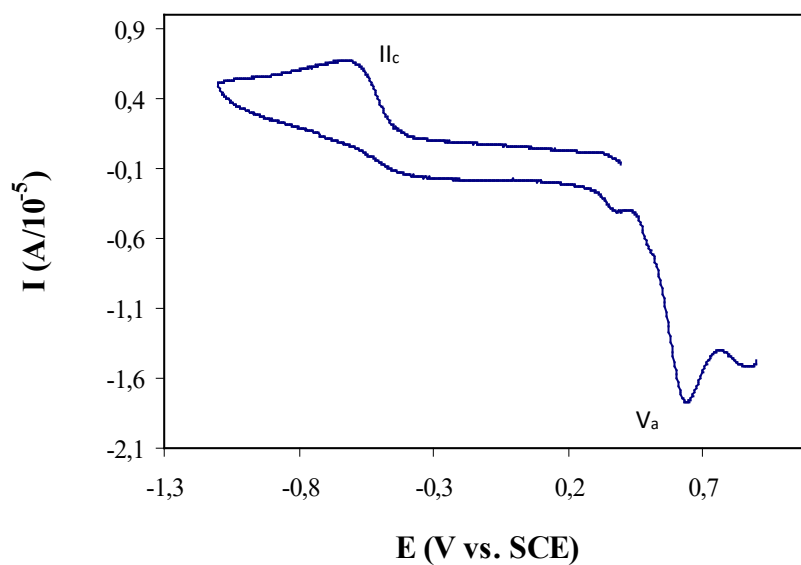

**Peak Potentials**

| System | (E <sub>p</sub> ) <sub>c</sub> | (E <sub>p</sub> ) <sub>a</sub> | (E <sub>p</sub> ) <sub>a</sub> - (E <sub>p</sub> ) <sub>c</sub> | [(E <sub>p</sub> ) <sub>a</sub> + (E <sub>p</sub> ) <sub>c</sub> ]/2 | (E <sub>p/2</sub> ) <sub>c</sub> | (E <sub>p/2</sub> ) <sub>c</sub> - (E <sub>p</sub> ) <sub>c</sub> | (E <sub>1/2</sub> ) <sub>c</sub> | E <sup>0'</sup> |
|--------|--------------------------------|--------------------------------|-----------------------------------------------------------------|----------------------------------------------------------------------|----------------------------------|-------------------------------------------------------------------|----------------------------------|-----------------|
| II:    | -0.620                         |                                |                                                                 |                                                                      | -0.500                           | 0.120                                                             | -0.528                           | -0.591          |
| V:     |                                | 0.643                          |                                                                 |                                                                      |                                  |                                                                   |                                  |                 |

[Cu(HAcHexim)(NO<sub>3</sub>)]·1/2H<sub>2</sub>O (7·1/2H<sub>2</sub>O)

E<sub>initial</sub>: 0.400 V

E<sub>vertex</sub>: -1.100 V

Speed: 0.200 V/s

E<sub>final</sub>: 0.898 V

Delay: 10 s

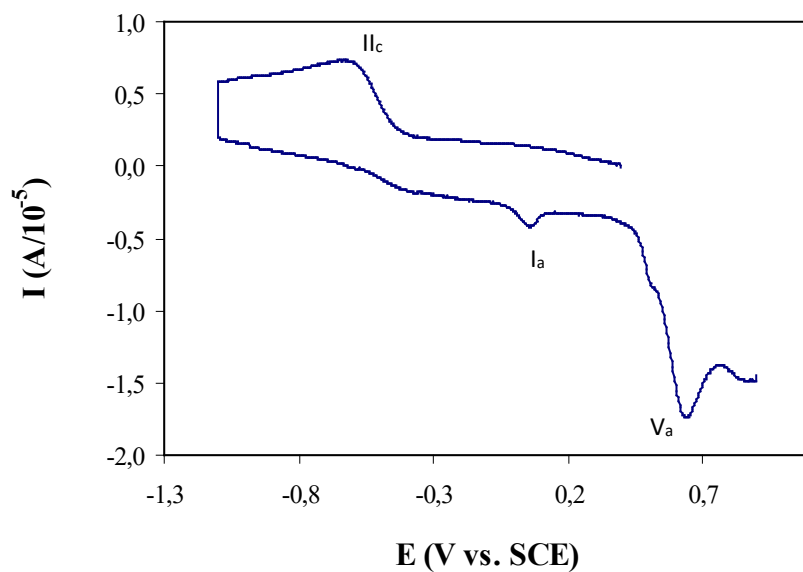

#### Peak Potentials

| System | (E <sub>p</sub> ) <sub>c</sub> | (E <sub>p</sub> ) <sub>a</sub> | (E <sub>p</sub> ) <sub>a</sub> - (E <sub>p</sub> ) <sub>c</sub> | [(E <sub>p</sub> ) <sub>a</sub> + (E <sub>p</sub> ) <sub>c</sub> ]/2 | (E <sub>p/2</sub> ) <sub>c</sub> | (E <sub>p/2</sub> ) <sub>c</sub> - (E <sub>p</sub> ) <sub>c</sub> | (E <sub>1/2</sub> ) <sub>c</sub> | E <sup>0'</sup> |
|--------|--------------------------------|--------------------------------|-----------------------------------------------------------------|----------------------------------------------------------------------|----------------------------------|-------------------------------------------------------------------|----------------------------------|-----------------|
| I:     |                                | 0.058                          |                                                                 |                                                                      |                                  |                                                                   |                                  |                 |
| II:    | -0.632                         |                                |                                                                 |                                                                      | -0.506                           | 0.126                                                             | -0.534                           | -0.603          |
| V:     |                                | 0.643                          |                                                                 |                                                                      |                                  |                                                                   |                                  |                 |

[Cu(HAcHexim)(NO<sub>3</sub>)]·1/2H<sub>2</sub>O (7·1/2H<sub>2</sub>O)

E<sub>initial</sub>: 0.200 V

E<sub>vertex</sub>: -1.300 V

Speed: 0.200 V/s

E<sub>final</sub>: 0.896 V

Delay: 10 s

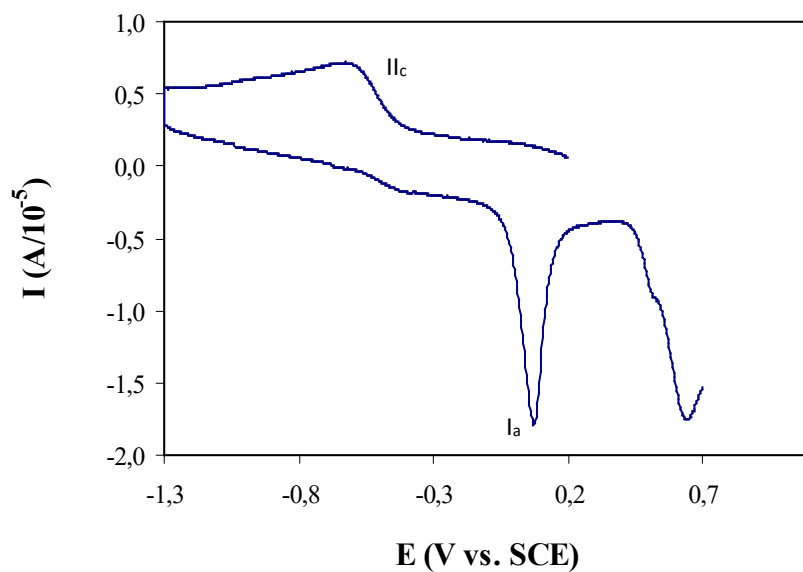

**Peak Potentials**

| System | (E <sub>p</sub> ) <sub>c</sub> | (E <sub>p</sub> ) <sub>a</sub> | (E <sub>p</sub> ) <sub>a</sub> - (E <sub>p</sub> ) <sub>c</sub> | [(E <sub>p</sub> ) <sub>a</sub> + (E <sub>p</sub> ) <sub>c</sub> ]/2 | (E <sub>p/2</sub> ) <sub>c</sub> | (E <sub>p/2</sub> ) <sub>c</sub> - (E <sub>p</sub> ) <sub>c</sub> | (E <sub>1/2</sub> ) <sub>c</sub> | E <sup>0'</sup> |
|--------|--------------------------------|--------------------------------|-----------------------------------------------------------------|----------------------------------------------------------------------|----------------------------------|-------------------------------------------------------------------|----------------------------------|-----------------|
| I:     |                                | 0.074                          |                                                                 |                                                                      |                                  |                                                                   |                                  |                 |
| II:    | -0.628                         |                                |                                                                 |                                                                      | -0.502                           | 0.126                                                             | -0.530                           | -0.599          |

[Cu(HAcHexim)ClO<sub>4</sub>] (8)

E<sub>initial</sub>: 0.900 V

E<sub>vertex</sub>: -2.200 V

Speed: 0.020 V/s

E<sub>final</sub>: 0.900 V

Delay: 0 s

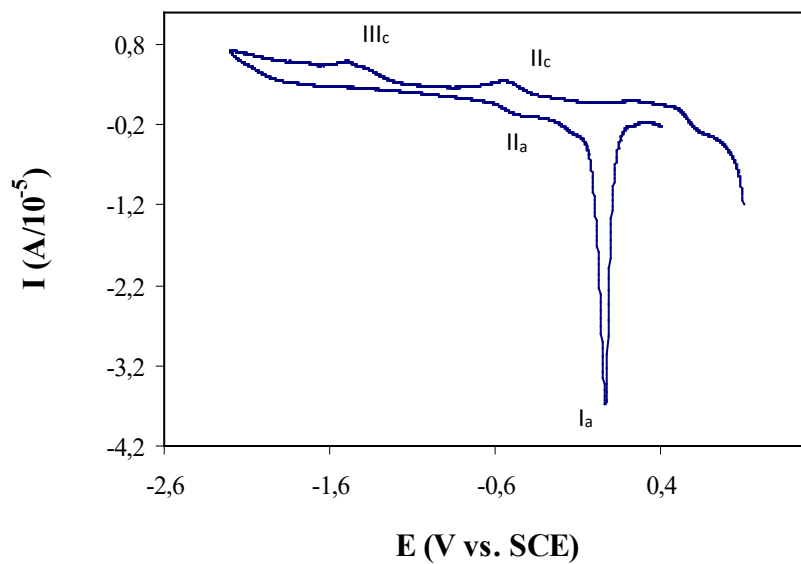

#### Peak Potentials

| System | (E <sub>p</sub> ) <sub>c</sub> | (E <sub>p</sub> ) <sub>a</sub> | (E <sub>p</sub> ) <sub>a</sub> - (E <sub>p</sub> ) <sub>c</sub> | [(E <sub>p</sub> ) <sub>a</sub> + (E <sub>p</sub> ) <sub>c</sub> ]/2 | (E <sub>p/2</sub> ) <sub>c</sub> | (E <sub>p/2</sub> ) <sub>c</sub> - (E <sub>p</sub> ) <sub>c</sub> | (E <sub>1/2</sub> ) <sub>c</sub> | E <sup>o'</sup> |
|--------|--------------------------------|--------------------------------|-----------------------------------------------------------------|----------------------------------------------------------------------|----------------------------------|-------------------------------------------------------------------|----------------------------------|-----------------|
| I:     |                                | 0.066                          |                                                                 |                                                                      |                                  |                                                                   |                                  |                 |
| II:    | -0.55                          | -0.428                         | 0.122                                                           | -0.489                                                               | -0.94                            | -0.390                                                            | -0.968                           | -0.522          |
| III:   | -1.492                         |                                |                                                                 |                                                                      | -1.322                           | 0.170                                                             | -1.350                           | -1.464          |

[Cu(HAc<sub>6</sub>Hexim)ClO<sub>4</sub>] (8)

E<sub>initial</sub>: 0.400 V

E<sub>vertex</sub>: -1.300 V

Speed: 0.200 V/s

E<sub>final</sub>: 0.400 V

Delay: 0 s

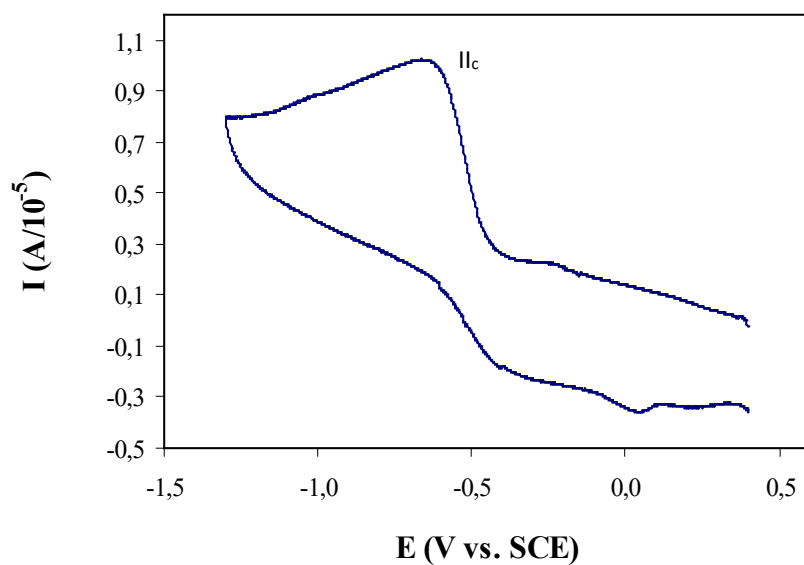

**Peak Potentials**

| System | (E <sub>p</sub> ) <sub>c</sub> | (E <sub>p</sub> ) <sub>a</sub> | (E <sub>p</sub> ) <sub>a</sub> - (E <sub>p</sub> ) <sub>c</sub> | [(E <sub>p</sub> ) <sub>a</sub> + (E <sub>p</sub> ) <sub>c</sub> ]/2 | (E <sub>p/2</sub> ) <sub>c</sub> | (E <sub>p/2</sub> ) <sub>c</sub> - (E <sub>p</sub> ) <sub>c</sub> | (E <sub>1/2</sub> ) <sub>c</sub> | E <sup>0'</sup> |
|--------|--------------------------------|--------------------------------|-----------------------------------------------------------------|----------------------------------------------------------------------|----------------------------------|-------------------------------------------------------------------|----------------------------------|-----------------|
| II:    | -0.662                         |                                |                                                                 |                                                                      | -0.520                           | 0.142                                                             | -0.547                           | -0.633          |

[Cu(HAc<sub>6</sub>Hexim)ClO<sub>4</sub>] (8)

E<sub>initial</sub>: 0.400 V

E<sub>vertex</sub>: -1.300 V

Speed: 0.200 V/s

E<sub>final</sub>: 0.400 V

Delay: 10 s

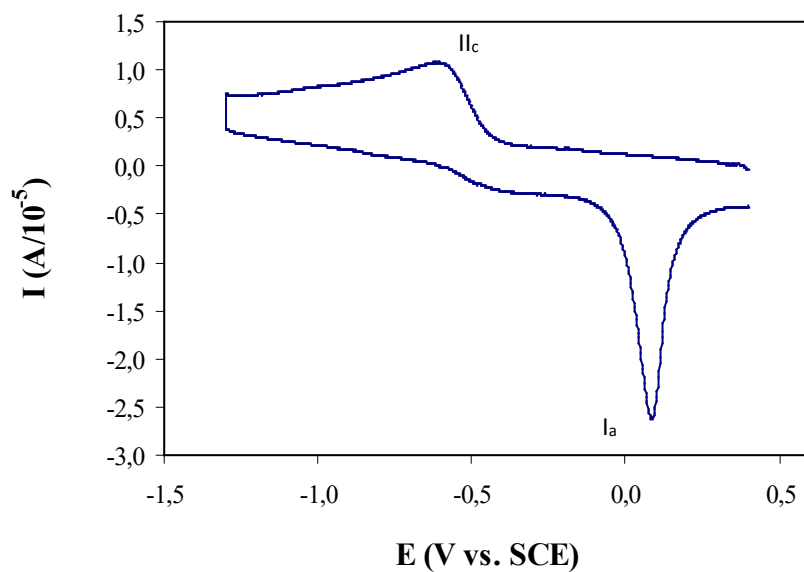

**Peak Potentials**

| System | (E <sub>p</sub> ) <sub>c</sub> | (E <sub>p</sub> ) <sub>a</sub> | (E <sub>p</sub> ) <sub>a</sub> - (E <sub>p</sub> ) <sub>c</sub> | [(E <sub>p</sub> ) <sub>a</sub> + (E <sub>p</sub> ) <sub>c</sub> ]/2 | (E <sub>p/2</sub> ) <sub>c</sub> | (E <sub>p/2</sub> ) <sub>c</sub> - (E <sub>p</sub> ) <sub>c</sub> | (E <sub>1/2</sub> ) <sub>c</sub> | E <sup>0'</sup> |
|--------|--------------------------------|--------------------------------|-----------------------------------------------------------------|----------------------------------------------------------------------|----------------------------------|-------------------------------------------------------------------|----------------------------------|-----------------|
| I:     |                                | 0.085                          |                                                                 |                                                                      |                                  |                                                                   |                                  |                 |
| II:    | -0.604                         |                                |                                                                 |                                                                      | -0.506                           | 0.098                                                             | -0.534                           | -0.576          |

[Cu(HAc<sub>6</sub>Hexim)ClO<sub>4</sub>] (8)

E<sub>initial</sub>: 0.400 V

E<sub>vertex</sub>: -0.900 V

Speed: 0.200 V/s

E<sub>final</sub>: 0.400 V

Delay: 0 s

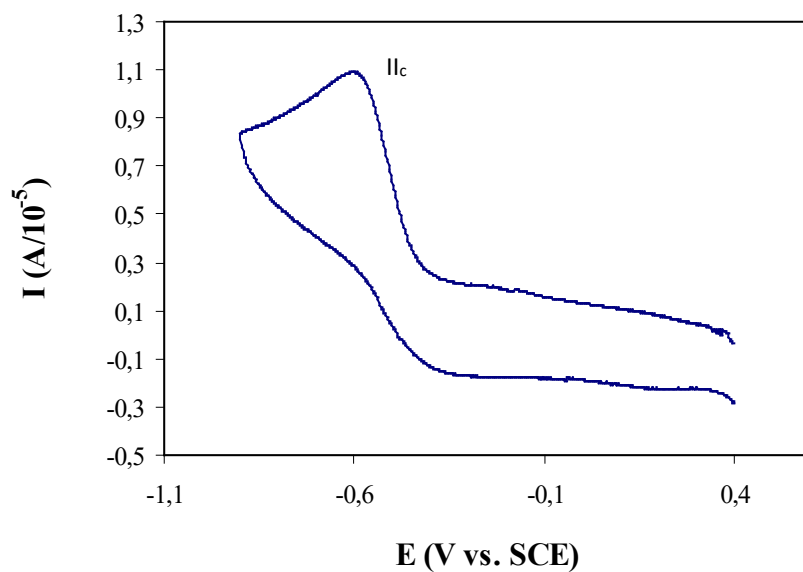

#### Peak Potentials

| System | (E <sub>p</sub> ) <sub>c</sub> | (E <sub>p</sub> ) <sub>a</sub> | (E <sub>p</sub> ) <sub>a</sub> - (E <sub>p</sub> ) <sub>c</sub> | [(E <sub>p</sub> ) <sub>a</sub> + (E <sub>p</sub> ) <sub>c</sub> ]/2 | (E <sub>p/2</sub> ) <sub>c</sub> | (E <sub>p/2</sub> ) <sub>c</sub> - (E <sub>p</sub> ) <sub>c</sub> | (E <sub>1/2</sub> ) <sub>c</sub> | E <sup>0'</sup> |
|--------|--------------------------------|--------------------------------|-----------------------------------------------------------------|----------------------------------------------------------------------|----------------------------------|-------------------------------------------------------------------|----------------------------------|-----------------|
| II:    | -0.604                         |                                |                                                                 |                                                                      | -0.502                           | 0.102                                                             | -0.529                           | -0.575          |
